# Supplementary material for: Exploring the comparative genome of rice pathogen Burkholderia plantarii: unveiling virulence, fitness traits, and a potential type III secretion system effector
Source: Frontiers journal article supplement (doi:10.3389/fpls.2024.1416253), 2024-05-23
Supplement: Table_2.XLS [file Table_2.XLS]

## Sheet: Islandviewer Results
Table S4. Genomic islands predicted y IslandViewer 4 in Burkholderua plantarii KACC18964 detailing the gene contents and potetnial gene products
Island start	Island end	Length	Method	Gene name	Gene ID	Locus	Gene start	Gene end	Strand	Product
2823	8186	5363	Predicted by at least one method	WP_304991428.1		GIY62_RS00035	2823	2999	-1	hypothetical protein
2823	8186	5363	Predicted by at least one method	WP_304991429.1		GIY62_RS00040	3264	3824	1	DUF1153 domain-containing protein
2823	8186	5363	Predicted by at least one method	WP_304991430.1		GIY62_RS00045	3803	4150	1	DDE-type integrase/transposase/recombinase
2823	8186	5363	Predicted by at least one method	WP_304991431.1		GIY62_RS00050	4561	5067	-1	hypothetical protein
2823	8186	5363	Predicted by at least one method	WP_304991432.1		GIY62_RS00055	5381	5566	1	hypothetical protein
2823	8186	5363	Predicted by at least one method	WP_042624821.1		GIY62_RS00060	5659	5937	-1	hypothetical protein
2823	8186	5363	Predicted by at least one method	WP_123863491.1		GIY62_RS00065	6243	6437	1	hypothetical protein
2823	8186	5363	Predicted by at least one method	WP_304991433.1		GIY62_RS00070	6437	7027	1	DNA-binding protein
2823	8186	5363	Predicted by at least one method	WP_123863492.1		GIY62_RS00075	7364	7594	1	hypothetical protein
2823	8186	5363	Predicted by at least one method	WP_304991434.1		GIY62_RS00080	7584	8186	1	hypothetical protein
127056	146320	19264	Predicted by at least one method	WP_304991480.1		GIY62_RS00640	126784	127059	1	baseplate assembly protein
127056	146320	19264	Predicted by at least one method	WP_304991481.1		GIY62_RS00645	127056	127322	1	hypothetical protein
127056	146320	19264	Predicted by at least one method	WP_304991482.1		GIY62_RS00650	127359	127688	-1	helix-turn-helix transcriptional regulator
127056	146320	19264	Predicted by at least one method	WP_304991483.1		GIY62_RS00655	127931	128527	1	hypothetical protein
127056	146320	19264	Predicted by at least one method	WP_304991484.1		GIY62_RS00660	128732	129022	-1	hypothetical protein
127056	146320	19264	Predicted by at least one method	WP_304991485.1		GIY62_RS00665	129187	129408	1	hypothetical protein
127056	146320	19264	Predicted by at least one method	WP_304991486.1		GIY62_RS00670	129409	129660	1	DUF3850 domain-containing protein
127056	146320	19264	Predicted by at least one method	WP_304991487.1		GIY62_RS00675	129657	129932	1	hypothetical protein
127056	146320	19264	Predicted by at least one method	WP_304991488.1		GIY62_RS00680	129929	130387	1	hypothetical protein
127056	146320	19264	Predicted by at least one method	WP_304991489.1		GIY62_RS00685	130387	131361	1	phosphoadenosine phosphosulfate reductase family protein
127056	146320	19264	Predicted by at least one method	WP_304991490.1		GIY62_RS00690	131588	133618	1	replication endonuclease
127056	146320	19264	Predicted by at least one method	WP_304992251.1		GIY62_RS00695	133621	133875	1	ogr/Delta-like zinc finger family protein
127056	146320	19264	Predicted by at least one method	WP_304992252.1		GIY62_RS00700	133926	134084	1	transcriptional regulator
127056	146320	19264	Predicted by at least one method	WP_304991491.1		GIY62_RS00705	134110	135147	1	hypothetical protein
127056	146320	19264	Predicted by at least one method			GIY62_RS00710	135157	135764	1	AAA family ATPase
127056	146320	19264	Predicted by at least one method	WP_304991492.1		GIY62_RS00715	135846	136073	1	hypothetical protein
127056	146320	19264	Predicted by at least one method	WP_304991493.1		GIY62_RS00720	136128	136406	-1	hypothetical protein
127056	146320	19264	Predicted by at least one method	WP_304991494.1		GIY62_RS00725	136408	137031	-1	PAAR domain-containing protein
127056	146320	19264	Predicted by at least one method	WP_304991495.1		GIY62_RS00730	137096	137728	-1	hypothetical protein
127056	146320	19264	Predicted by at least one method	WP_304991496.1		GIY62_RS00735	138207	139565	1	HEPN domain-containing protein
127056	146320	19264	Predicted by at least one method	WP_304991497.1		GIY62_RS00740	139898	140962	-1	phage portal protein
127056	146320	19264	Predicted by at least one method	WP_304991498.1		GIY62_RS00745	140962	142725	-1	terminase ATPase subunit family protein
127056	146320	19264	Predicted by at least one method	WP_304992253.1		GIY62_RS00750	143030	143992	1	GPO family capsid scaffolding protein
127056	146320	19264	Predicted by at least one method	WP_304991499.1		GIY62_RS00755	144051	145067	1	phage major capsid protein, P2 family
127056	146320	19264	Predicted by at least one method	WP_304992254.1	gpM	GIY62_RS00760	145064	145747	1	phage terminase small subunit
127056	146320	19264	Predicted by at least one method	WP_304991500.1		GIY62_RS00765	145847	146320	1	head completion/stabilization protein
127056	146320	19264	Predicted by at least one method	WP_304991501.1		GIY62_RS00770	146317	146526	1	tail protein X
135846	142725	6879	Predicted by at least one method	WP_304991492.1		GIY62_RS00715	135846	136073	1	hypothetical protein
135846	142725	6879	Predicted by at least one method	WP_304991493.1		GIY62_RS00720	136128	136406	-1	hypothetical protein
135846	142725	6879	Predicted by at least one method	WP_304991494.1		GIY62_RS00725	136408	137031	-1	PAAR domain-containing protein
135846	142725	6879	Predicted by at least one method	WP_304991495.1		GIY62_RS00730	137096	137728	-1	hypothetical protein
135846	142725	6879	Predicted by at least one method	WP_304991496.1		GIY62_RS00735	138207	139565	1	HEPN domain-containing protein
135846	142725	6879	Predicted by at least one method	WP_304991497.1		GIY62_RS00740	139898	140962	-1	phage portal protein
135846	142725	6879	Predicted by at least one method	WP_304991498.1		GIY62_RS00745	140962	142725	-1	terminase ATPase subunit family protein
147969	155515	7546	Predicted by at least one method	WP_304991504.1		GIY62_RS00785	147154	147972	1	N-acetylmuramidase family protein
147969	155515	7546	Predicted by at least one method	WP_304991505.1		GIY62_RS00790	147969	148412	1	protein lysB
147969	155515	7546	Predicted by at least one method	WP_304991506.1	lysC	GIY62_RS00795	148306	148551	1	Rz1-like lysis system protein LysC
147969	155515	7546	Predicted by at least one method	WP_304991507.1		GIY62_RS00800	148544	148972	1	phage tail protein
147969	155515	7546	Predicted by at least one method	WP_304991508.1		GIY62_RS00805	148969	149442	1	phage virion morphogenesis protein
147969	155515	7546	Predicted by at least one method	WP_304991509.1		GIY62_RS00810	149498	151006	-1	hypothetical protein
147969	155515	7546	Predicted by at least one method	WP_304992255.1		GIY62_RS00815	151351	152055	1	phage baseplate assembly protein V
147969	155515	7546	Predicted by at least one method	WP_304991510.1		GIY62_RS00820	152052	152408	1	GPW/gp25 family protein
147969	155515	7546	Predicted by at least one method	WP_304991511.1		GIY62_RS00825	152405	153325	1	baseplate J/gp47 family protein
147969	155515	7546	Predicted by at least one method	WP_304991512.1		GIY62_RS00830	153318	153935	1	phage tail protein I
147969	155515	7546	Predicted by at least one method	WP_304991513.1		GIY62_RS00835	153932	155515	1	hypothetical protein
152052	159482	7430	Predicted by at least one method	WP_304992255.1		GIY62_RS00815	151351	152055	1	phage baseplate assembly protein V
152052	159482	7430	Predicted by at least one method	WP_304991510.1		GIY62_RS00820	152052	152408	1	GPW/gp25 family protein
152052	159482	7430	Predicted by at least one method	WP_304991511.1		GIY62_RS00825	152405	153325	1	baseplate J/gp47 family protein
152052	159482	7430	Predicted by at least one method	WP_304991512.1		GIY62_RS00830	153318	153935	1	phage tail protein I
152052	159482	7430	Predicted by at least one method	WP_304991513.1		GIY62_RS00835	153932	155515	1	hypothetical protein
152052	159482	7430	Predicted by at least one method	WP_304991514.1		GIY62_RS00840	155517	156908	1	phage tail protein
152052	159482	7430	Predicted by at least one method	WP_304991515.1		GIY62_RS00845	156911	157192	1	phage tail protein
152052	159482	7430	Predicted by at least one method	WP_304991516.1		GIY62_RS00850	157248	158420	1	phage tail sheath protein
152052	159482	7430	Predicted by at least one method	WP_304991517.1		GIY62_RS00855	158479	158988	1	phage major tail tube protein
152052	159482	7430	Predicted by at least one method	WP_304991518.1		GIY62_RS00860	159022	159357	1	phage tail assembly protein
152052	159482	7430	Predicted by at least one method	WP_304991519.1		GIY62_RS00865	159366	159482	1	GpE family phage tail protein
458651	482065	23414	Predicted by at least one method	WP_304992259.1		GIY62_RS02195	458651	459700	1	recombinase family protein
458651	482065	23414	Predicted by at least one method	WP_042626716.1		GIY62_RS02200	459734	460048	1	DUF1153 domain-containing protein
458651	482065	23414	Predicted by at least one method	WP_304991634.1		GIY62_RS02205	460045	460866	1	IS3 family transposase
458651	482065	23414	Predicted by at least one method	WP_304991635.1		GIY62_RS02210	460870	461265	1	hypothetical protein
458651	482065	23414	Predicted by at least one method	WP_304991636.1		GIY62_RS02215	461660	463117	-1	AAA family ATPase
458651	482065	23414	Predicted by at least one method	WP_304991637.1		GIY62_RS02220	463618	464073	1	hypothetical protein
458651	482065	23414	Predicted by at least one method	WP_304991638.1		GIY62_RS02225	464507	465958	-1	IS1182 family transposase
458651	482065	23414	Predicted by at least one method	WP_304991639.1		GIY62_RS02230	466288	467091	-1	hypothetical protein
458651	482065	23414	Predicted by at least one method	WP_304991640.1		GIY62_RS02235	467606	467959	1	colicin immunity protein
458651	482065	23414	Predicted by at least one method	WP_304991641.1		GIY62_RS02240	468192	468860	-1	GntR family transcriptional regulator
458651	482065	23414	Predicted by at least one method	WP_304991642.1		GIY62_RS02245	468995	470062	1	isocitrate/isopropylmalate family dehydrogenase
458651	482065	23414	Predicted by at least one method	WP_304991643.1		GIY62_RS02250	470138	471397	1	MFS transporter
458651	482065	23414	Predicted by at least one method	WP_304991644.1		GIY62_RS02255	471434	472396	1	amidohydrolase family protein
458651	482065	23414	Predicted by at least one method			GIY62_RS02260	472619	473245	1	tyrosine-type recombinase/integrase
458651	482065	23414	Predicted by at least one method	WP_055140560.1		GIY62_RS02265	473351	474094	1	SDR family oxidoreductase
458651	482065	23414	Predicted by at least one method	WP_304991645.1		GIY62_RS02270	474332	475495	-1	hypothetical protein
458651	482065	23414	Predicted by at least one method	WP_304991646.1		GIY62_RS02275	475923	476117	1	hypothetical protein
458651	482065	23414	Predicted by at least one method	WP_304991647.1		GIY62_RS02280	476267	477958	-1	methyl-accepting chemotaxis protein
458651	482065	23414	Predicted by at least one method			GIY62_RS02285	478139	478760	1	IS3 family transposase
458651	482065	23414	Predicted by at least one method			GIY62_RS02290	478791	479096	-1	helix-turn-helix domain-containing protein
458651	482065	23414	Predicted by at least one method	WP_042625142.1		GIY62_RS02295	479235	479810	-1	TetR/AcrR family transcriptional regulator
458651	482065	23414	Predicted by at least one method	WP_042625143.1		GIY62_RS02300	480006	480710	1	glutathione S-transferase C-terminal domain-containing protein
458651	482065	23414	Predicted by at least one method			GIY62_RS02305	480982	481437	1	transposase
458651	482065	23414	Predicted by at least one method	WP_052498331.1		GIY62_RS02310	481577	482065	-1	cupin domain-containing protein
459734	470062	10328	Predicted by at least one method	WP_042626716.1		GIY62_RS02200	459734	460048	1	DUF1153 domain-containing protein
459734	470062	10328	Predicted by at least one method	WP_304991634.1		GIY62_RS02205	460045	460866	1	IS3 family transposase
459734	470062	10328	Predicted by at least one method	WP_304991635.1		GIY62_RS02210	460870	461265	1	hypothetical protein
459734	470062	10328	Predicted by at least one method	WP_304991636.1		GIY62_RS02215	461660	463117	-1	AAA family ATPase
459734	470062	10328	Predicted by at least one method	WP_304991637.1		GIY62_RS02220	463618	464073	1	hypothetical protein
459734	470062	10328	Predicted by at least one method	WP_304991638.1		GIY62_RS02225	464507	465958	-1	IS1182 family transposase
459734	470062	10328	Predicted by at least one method	WP_304991639.1		GIY62_RS02230	466288	467091	-1	hypothetical protein
459734	470062	10328	Predicted by at least one method	WP_304991640.1		GIY62_RS02235	467606	467959	1	colicin immunity protein
459734	470062	10328	Predicted by at least one method	WP_304991641.1		GIY62_RS02240	468192	468860	-1	GntR family transcriptional regulator
459734	470062	10328	Predicted by at least one method	WP_304991642.1		GIY62_RS02245	468995	470062	1	isocitrate/isopropylmalate family dehydrogenase
471434	480710	9276	Predicted by at least one method	WP_304991644.1		GIY62_RS02255	471434	472396	1	amidohydrolase family protein
471434	480710	9276	Predicted by at least one method			GIY62_RS02260	472619	473245	1	tyrosine-type recombinase/integrase
471434	480710	9276	Predicted by at least one method	WP_055140560.1		GIY62_RS02265	473351	474094	1	SDR family oxidoreductase
471434	480710	9276	Predicted by at least one method	WP_304991645.1		GIY62_RS02270	474332	475495	-1	hypothetical protein
471434	480710	9276	Predicted by at least one method	WP_304991646.1		GIY62_RS02275	475923	476117	1	hypothetical protein
471434	480710	9276	Predicted by at least one method	WP_304991647.1		GIY62_RS02280	476267	477958	-1	methyl-accepting chemotaxis protein
471434	480710	9276	Predicted by at least one method			GIY62_RS02285	478139	478760	1	IS3 family transposase
471434	480710	9276	Predicted by at least one method			GIY62_RS02290	478791	479096	-1	helix-turn-helix domain-containing protein
471434	480710	9276	Predicted by at least one method	WP_042625142.1		GIY62_RS02295	479235	479810	-1	TetR/AcrR family transcriptional regulator
471434	480710	9276	Predicted by at least one method	WP_042625143.1		GIY62_RS02300	480006	480710	1	glutathione S-transferase C-terminal domain-containing protein
755750	827736	71986	Predicted by at least one method	WP_304991729.1		GIY62_RS03505	755750	756607	1	alpha/beta hydrolase
755750	827736	71986	Predicted by at least one method	WP_304991730.1		GIY62_RS03510	756640	757386	1	glucose 1-dehydrogenase
755750	827736	71986	Predicted by at least one method	WP_304991731.1		GIY62_RS03515	757425	758057	1	glutathione S-transferase
755750	827736	71986	Predicted by at least one method	WP_304992315.1		GIY62_RS03520	758086	758247	-1	hypothetical protein
755750	827736	71986	Predicted by at least one method			GIY62_RS03525	759002	759975	1	IS481 family transposase
755750	827736	71986	Predicted by at least one method	WP_027807006.1		GIY62_RS03530	760788	761384	1	DUF6088 family protein
755750	827736	71986	Predicted by at least one method	WP_027807005.1		GIY62_RS03535	761377	762399	1	nucleotidyl transferase AbiEii/AbiGii toxin family protein
755750	827736	71986	Predicted by at least one method	WP_244125932.1		GIY62_RS03540	762435	762872	1	AAA family ATPase
755750	827736	71986	Predicted by at least one method	WP_063900147.1		GIY62_RS03545	762875	763927	1	hypothetical protein
755750	827736	71986	Predicted by at least one method	WP_304991732.1		GIY62_RS03550	763924	766887	1	AAA family ATPase
755750	827736	71986	Predicted by at least one method	WP_148654007.1		GIY62_RS03555	766902	768485	1	hypothetical protein
755750	827736	71986	Predicted by at least one method	WP_304991733.1		GIY62_RS03560	768424	768963	-1	hypothetical protein
755750	827736	71986	Predicted by at least one method	WP_304991634.1		GIY62_RS03565	769013	769834	-1	IS3 family transposase
755750	827736	71986	Predicted by at least one method	WP_042626716.1		GIY62_RS03570	769831	770145	-1	DUF1153 domain-containing protein
755750	827736	71986	Predicted by at least one method	WP_027806998.1		GIY62_RS03575	770471	770692	-1	DUF2274 domain-containing protein
755750	827736	71986	Predicted by at least one method	WP_148654008.1		GIY62_RS03580	770689	771981	-1	TrbI/VirB10 family protein
755750	827736	71986	Predicted by at least one method	WP_051656996.1	trbG	GIY62_RS03585	771968	772975	-1	P-type conjugative transfer protein TrbG
755750	827736	71986	Predicted by at least one method	WP_027806995.1	trbF	GIY62_RS03590	772972	773679	-1	conjugal transfer protein TrbF
755750	827736	71986	Predicted by at least one method	WP_055138897.1	trbL	GIY62_RS03595	773692	775047	-1	P-type conjugative transfer protein TrbL
755750	827736	71986	Predicted by at least one method	WP_027806993.1		GIY62_RS03600	775044	775334	-1	hypothetical protein
755750	827736	71986	Predicted by at least one method	WP_055138898.1	trbJ	GIY62_RS03605	775340	776068	-1	P-type conjugative transfer protein TrbJ
755750	827736	71986	Predicted by at least one method	WP_027806991.1	trbE	GIY62_RS03610	776065	778491	-1	conjugal transfer protein TrbE
755750	827736	71986	Predicted by at least one method			GIY62_RS03615	778512	778781	-1	VirB3 family type IV secretion system protein
755750	827736	71986	Predicted by at least one method	WP_027806989.1		GIY62_RS03620	778778	779146	-1	TrbC/VirB2 family protein
755750	827736	71986	Predicted by at least one method	WP_055138899.1	trbB	GIY62_RS03625	779143	780147	-1	P-type conjugative transfer ATPase TrbB
755750	827736	71986	Predicted by at least one method	WP_027806987.1		GIY62_RS03630	780144	780608	-1	CopG family transcriptional regulator
755750	827736	71986	Predicted by at least one method			GIY62_RS03635	780605	782607	-1	conjugal transfer protein TraG
755750	827736	71986	Predicted by at least one method			GIY62_RS03640	782846	782996	-1	entry exclusion lipoprotein TrbK
755750	827736	71986	Predicted by at least one method	WP_080289154.1		GIY62_RS03645	783086	784021	-1	LysR family transcriptional regulator
755750	827736	71986	Predicted by at least one method	WP_229290718.1		GIY62_RS03650	784073	784708	-1	DsbA family protein
755750	827736	71986	Predicted by at least one method	WP_082465272.1		GIY62_RS03655	784738	785649	-1	oxidoreductase
755750	827736	71986	Predicted by at least one method	WP_027806983.1		GIY62_RS03660	785679	786332	-1	SDR family oxidoreductase
755750	827736	71986	Predicted by at least one method	WP_055138901.1		GIY62_RS03665	786337	786954	-1	NAD(P)H-dependent oxidoreductase
755750	827736	71986	Predicted by at least one method	WP_027806981.1		GIY62_RS03670	787064	787498	1	helix-turn-helix domain-containing protein
755750	827736	71986	Predicted by at least one method	WP_055138902.1		GIY62_RS03675	787539	789500	-1	relaxase/mobilization nuclease and DUF3363 domain-containing protein
755750	827736	71986	Predicted by at least one method	WP_027806979.1		GIY62_RS03680	789937	790524	-1	S26 family signal peptidase
755750	827736	71986	Predicted by at least one method	WP_055138903.1		GIY62_RS03685	790521	791054	-1	DUF2840 domain-containing protein
755750	827736	71986	Predicted by at least one method	WP_034196465.1		GIY62_RS03690	791051	791302	-1	hypothetical protein
755750	827736	71986	Predicted by at least one method	WP_055138904.1	parA	GIY62_RS03695	791299	791937	-1	ParA family partition ATPase
755750	827736	71986	Predicted by at least one method	WP_027806975.1		GIY62_RS03700	792179	793024	-1	replication initiator protein A
755750	827736	71986	Predicted by at least one method	WP_027806974.1		GIY62_RS03705	793039	793320	-1	helix-turn-helix domain-containing protein
755750	827736	71986	Predicted by at least one method	WP_055138905.1		GIY62_RS03710	793446	794201	-1	DUF2285 domain-containing protein
755750	827736	71986	Predicted by at least one method	WP_027806972.1		GIY62_RS03715	794519	794869	-1	DUF2958 domain-containing protein
755750	827736	71986	Predicted by at least one method	WP_027806971.1		GIY62_RS03720	795168	795458	1	helix-turn-helix transcriptional regulator
755750	827736	71986	Predicted by at least one method	WP_055138906.1		GIY62_RS03725	795508	795825	-1	DUF736 domain-containing protein
755750	827736	71986	Predicted by at least one method	WP_055138907.1		GIY62_RS03730	796587	798641	-1	ParB/RepB/Spo0J family partition protein
755750	827736	71986	Predicted by at least one method	WP_055138908.1		GIY62_RS03735	798721	799545	-1	DUF932 domain-containing protein
755750	827736	71986	Predicted by at least one method	WP_158512027.1		GIY62_RS03740	800144	800803	1	CPBP family intramembrane metalloprotease
755750	827736	71986	Predicted by at least one method	WP_148654009.1		GIY62_RS03745	800828	801820	1	hypothetical protein
755750	827736	71986	Predicted by at least one method	WP_304991734.1		GIY62_RS03750	801839	802858	1	DUF4917 family protein
755750	827736	71986	Predicted by at least one method	WP_055138910.1		GIY62_RS03755	802899	803561	1	hypothetical protein
755750	827736	71986	Predicted by at least one method	WP_055138911.1		GIY62_RS03760	803640	806024	-1	type I restriction enzyme HsdR N-terminal domain-containing protein
755750	827736	71986	Predicted by at least one method	WP_055138912.1		GIY62_RS03765	806037	807353	-1	DUF5623 domain-containing protein
755750	827736	71986	Predicted by at least one method	WP_055138913.1		GIY62_RS03770	807681	809174	1	glyoxalase superfamily protein
755750	827736	71986	Predicted by at least one method	WP_055138914.1		GIY62_RS03775	809256	810074	1	hypothetical protein
755750	827736	71986	Predicted by at least one method	WP_082465274.1		GIY62_RS03780	810148	810507	1	AlpA family phage regulatory protein
755750	827736	71986	Predicted by at least one method	WP_055138916.1		GIY62_RS03785	810532	811788	-1	site-specific integrase
755750	827736	71986	Predicted by at least one method	WP_042625330.1	guaA	GIY62_RS03790	812100	813719	-1	glutamine-hydrolyzing GMP synthase
755750	827736	71986	Predicted by at least one method	WP_304991735.1		GIY62_RS03795	813872	814540	-1	hypothetical protein
755750	827736	71986	Predicted by at least one method	WP_042625332.1	guaB	GIY62_RS03800	814547	816007	-1	IMP dehydrogenase
755750	827736	71986	Predicted by at least one method	WP_304991736.1		GIY62_RS03805	816365	817357	1	DMT family transporter
755750	827736	71986	Predicted by at least one method	WP_304991737.1		GIY62_RS03810	817566	817889	-1	RnfH family protein
755750	827736	71986	Predicted by at least one method	WP_042625335.1		GIY62_RS03815	817892	818329	-1	type II toxin-antitoxin system RatA family toxin
755750	827736	71986	Predicted by at least one method	WP_042625336.1	smpB	GIY62_RS03820	818424	818879	1	SsrA-binding protein SmpB
755750	827736	71986	Predicted by at least one method	WP_042625337.1		GIY62_RS03825	818999	819931	-1	stomatin-like protein
755750	827736	71986	Predicted by at least one method	WP_304991738.1		GIY62_RS03830	819980	820414	-1	NfeD family protein
755750	827736	71986	Predicted by at least one method	WP_042625339.1	ppsA	GIY62_RS03835	820554	822956	-1	phosphoenolpyruvate synthase
755750	827736	71986	Predicted by at least one method	WP_042625340.1		GIY62_RS03840	823426	824241	1	pyruvate, water dikinase regulatory protein
755750	827736	71986	Predicted by at least one method	WP_042625341.1		GIY62_RS03845	824336	825118	-1	RNA methyltransferase
755750	827736	71986	Predicted by at least one method	WP_042625342.1	rnhB	GIY62_RS03850	825130	825777	-1	ribonuclease HII
755750	827736	71986	Predicted by at least one method	WP_042625343.1	lpxB	GIY62_RS03855	825774	826943	-1	lipid-A-disaccharide synthase
755750	827736	71986	Predicted by at least one method	WP_042625344.1	lpxA	GIY62_RS03860	826948	827736	-1	acyl-ACP--UDP-N-acetylglucosamine O-acyltransferase
759002	773679	14677	Predicted by at least one method			GIY62_RS03525	759002	759975	1	IS481 family transposase
759002	773679	14677	Predicted by at least one method	WP_027807006.1		GIY62_RS03530	760788	761384	1	DUF6088 family protein
759002	773679	14677	Predicted by at least one method	WP_027807005.1		GIY62_RS03535	761377	762399	1	nucleotidyl transferase AbiEii/AbiGii toxin family protein
759002	773679	14677	Predicted by at least one method	WP_244125932.1		GIY62_RS03540	762435	762872	1	AAA family ATPase
759002	773679	14677	Predicted by at least one method	WP_063900147.1		GIY62_RS03545	762875	763927	1	hypothetical protein
759002	773679	14677	Predicted by at least one method	WP_304991732.1		GIY62_RS03550	763924	766887	1	AAA family ATPase
759002	773679	14677	Predicted by at least one method	WP_148654007.1		GIY62_RS03555	766902	768485	1	hypothetical protein
759002	773679	14677	Predicted by at least one method	WP_304991733.1		GIY62_RS03560	768424	768963	-1	hypothetical protein
759002	773679	14677	Predicted by at least one method	WP_304991634.1		GIY62_RS03565	769013	769834	-1	IS3 family transposase
759002	773679	14677	Predicted by at least one method	WP_042626716.1		GIY62_RS03570	769831	770145	-1	DUF1153 domain-containing protein
759002	773679	14677	Predicted by at least one method	WP_027806998.1		GIY62_RS03575	770471	770692	-1	DUF2274 domain-containing protein
759002	773679	14677	Predicted by at least one method	WP_148654008.1		GIY62_RS03580	770689	771981	-1	TrbI/VirB10 family protein
759002	773679	14677	Predicted by at least one method	WP_051656996.1	trbG	GIY62_RS03585	771968	772975	-1	P-type conjugative transfer protein TrbG
759002	773679	14677	Predicted by at least one method	WP_027806995.1	trbF	GIY62_RS03590	772972	773679	-1	conjugal transfer protein TrbF
778778	784021	5243	Predicted by at least one method			GIY62_RS03615	778512	778781	-1	VirB3 family type IV secretion system protein
778778	784021	5243	Predicted by at least one method	WP_027806989.1		GIY62_RS03620	778778	779146	-1	TrbC/VirB2 family protein
778778	784021	5243	Predicted by at least one method	WP_055138899.1	trbB	GIY62_RS03625	779143	780147	-1	P-type conjugative transfer ATPase TrbB
778778	784021	5243	Predicted by at least one method	WP_027806987.1		GIY62_RS03630	780144	780608	-1	CopG family transcriptional regulator
778778	784021	5243	Predicted by at least one method			GIY62_RS03635	780605	782607	-1	conjugal transfer protein TraG
778778	784021	5243	Predicted by at least one method			GIY62_RS03640	782846	782996	-1	entry exclusion lipoprotein TrbK
778778	784021	5243	Predicted by at least one method	WP_080289154.1		GIY62_RS03645	783086	784021	-1	LysR family transcriptional regulator
784738	790524	5786	Predicted by at least one method	WP_082465272.1		GIY62_RS03655	784738	785649	-1	oxidoreductase
784738	790524	5786	Predicted by at least one method	WP_027806983.1		GIY62_RS03660	785679	786332	-1	SDR family oxidoreductase
784738	790524	5786	Predicted by at least one method	WP_055138901.1		GIY62_RS03665	786337	786954	-1	NAD(P)H-dependent oxidoreductase
784738	790524	5786	Predicted by at least one method	WP_027806981.1		GIY62_RS03670	787064	787498	1	helix-turn-helix domain-containing protein
784738	790524	5786	Predicted by at least one method	WP_055138902.1		GIY62_RS03675	787539	789500	-1	relaxase/mobilization nuclease and DUF3363 domain-containing protein
784738	790524	5786	Predicted by at least one method	WP_027806979.1		GIY62_RS03680	789937	790524	-1	S26 family signal peptidase
784738	790524	5786	Predicted by at least one method	WP_055138903.1		GIY62_RS03685	790521	791054	-1	DUF2840 domain-containing protein
800144	811788	11644	Predicted by at least one method	WP_158512027.1		GIY62_RS03740	800144	800803	1	CPBP family intramembrane metalloprotease
800144	811788	11644	Predicted by at least one method	WP_148654009.1		GIY62_RS03745	800828	801820	1	hypothetical protein
800144	811788	11644	Predicted by at least one method	WP_304991734.1		GIY62_RS03750	801839	802858	1	DUF4917 family protein
800144	811788	11644	Predicted by at least one method	WP_055138910.1		GIY62_RS03755	802899	803561	1	hypothetical protein
800144	811788	11644	Predicted by at least one method	WP_055138911.1		GIY62_RS03760	803640	806024	-1	type I restriction enzyme HsdR N-terminal domain-containing protein
800144	811788	11644	Predicted by at least one method	WP_055138912.1		GIY62_RS03765	806037	807353	-1	DUF5623 domain-containing protein
800144	811788	11644	Predicted by at least one method	WP_055138913.1		GIY62_RS03770	807681	809174	1	glyoxalase superfamily protein
800144	811788	11644	Predicted by at least one method	WP_055138914.1		GIY62_RS03775	809256	810074	1	hypothetical protein
800144	811788	11644	Predicted by at least one method	WP_082465274.1		GIY62_RS03780	810148	810507	1	AlpA family phage regulatory protein
800144	811788	11644	Predicted by at least one method	WP_055138916.1		GIY62_RS03785	810532	811788	-1	site-specific integrase
1249794	1254080	4286	Predicted by at least one method	WP_304991884.1		GIY62_RS05755	1249794	1251023	-1	polysialyltransferase family glycosyltransferase
1249794	1254080	4286	Predicted by at least one method	WP_304991885.1		GIY62_RS05760	1251064	1252608	-1	glycosyltransferase
1249794	1254080	4286	Predicted by at least one method	WP_304991886.1		GIY62_RS05765	1252616	1252990	-1	hypothetical protein
1249794	1254080	4286	Predicted by at least one method	WP_304991887.1		GIY62_RS05770	1253055	1253825	-1	glycosyltransferase family A protein
1249794	1254080	4286	Predicted by at least one method	WP_304991888.1		GIY62_RS05775	1253847	1254080	-1	hypothetical protein
1335505	1346722	11217	Predicted by at least one method	WP_304991917.1		GIY62_RS06115	1335057	1335530	-1	glucosaminidase domain-containing protein
1335505	1346722	11217	Predicted by at least one method	WP_304991918.1		GIY62_RS06120	1335505	1335876	-1	hypothetical protein
1335505	1346722	11217	Predicted by at least one method	WP_304991919.1		GIY62_RS06125	1335942	1337939	-1	hypothetical protein
1335505	1346722	11217	Predicted by at least one method	WP_304991920.1		GIY62_RS06130	1337991	1341032	-1	host specificity factor TipJ family phage tail protein
1335505	1346722	11217	Predicted by at least one method	WP_304991921.1		GIY62_RS06135	1341082	1341495	-1	NlpC/P60 family protein
1335505	1346722	11217	Predicted by at least one method	WP_304991922.1		GIY62_RS06140	1341492	1342031	-1	DUF1833 family protein
1335505	1346722	11217	Predicted by at least one method	WP_304991923.1		GIY62_RS06145	1342031	1342531	-1	hypothetical protein
1335505	1346722	11217	Predicted by at least one method	WP_304991924.1		GIY62_RS06150	1342534	1346010	-1	phage tail tape measure C-terminal domain-containing protein
1335505	1346722	11217	Predicted by at least one method	WP_304991925.1		GIY62_RS06155	1346007	1346252	-1	DUF4035 domain-containing protein
1335505	1346722	11217	Predicted by at least one method	WP_304991926.1		GIY62_RS06160	1346303	1346722	-1	phage tail assembly chaperone
1335505	1342531	7026	Predicted by at least one method	WP_304991917.1		GIY62_RS06115	1335057	1335530	-1	glucosaminidase domain-containing protein
1335505	1342531	7026	Predicted by at least one method	WP_304991918.1		GIY62_RS06120	1335505	1335876	-1	hypothetical protein
1335505	1342531	7026	Predicted by at least one method	WP_304991919.1		GIY62_RS06125	1335942	1337939	-1	hypothetical protein
1335505	1342531	7026	Predicted by at least one method	WP_304991920.1		GIY62_RS06130	1337991	1341032	-1	host specificity factor TipJ family phage tail protein
1335505	1342531	7026	Predicted by at least one method	WP_304991921.1		GIY62_RS06135	1341082	1341495	-1	NlpC/P60 family protein
1335505	1342531	7026	Predicted by at least one method	WP_304991922.1		GIY62_RS06140	1341492	1342031	-1	DUF1833 family protein
1335505	1342531	7026	Predicted by at least one method	WP_304991923.1		GIY62_RS06145	1342031	1342531	-1	hypothetical protein
1350989	1362461	11472	Predicted by at least one method	WP_304991934.1		GIY62_RS06200	1350989	1351765	-1	Clp protease ClpP
1350989	1362461	11472	Predicted by at least one method	WP_304991935.1		GIY62_RS06205	1351734	1353008	-1	phage portal protein
1350989	1362461	11472	Predicted by at least one method	WP_304991936.1		GIY62_RS06210	1353005	1354696	-1	terminase large subunit
1350989	1362461	11472	Predicted by at least one method	WP_304991937.1		GIY62_RS06215	1354693	1355196	-1	hypothetical protein
1350989	1362461	11472	Predicted by at least one method	WP_304991938.1		GIY62_RS06220	1355476	1355844	-1	HNH endonuclease
1350989	1362461	11472	Predicted by at least one method	WP_304991939.1		GIY62_RS06225	1355884	1356117	1	hypothetical protein
1350989	1362461	11472	Predicted by at least one method	WP_304991940.1		GIY62_RS06230	1356070	1356300	-1	hypothetical protein
1350989	1362461	11472	Predicted by at least one method	WP_304991941.1		GIY62_RS06235	1356435	1356764	-1	hypothetical protein
1350989	1362461	11472	Predicted by at least one method	WP_304991942.1		GIY62_RS06240	1356856	1357926	-1	helix-turn-helix domain-containing protein
1350989	1362461	11472	Predicted by at least one method	WP_304991943.1	dnaB	GIY62_RS06245	1357930	1359291	-1	replicative DNA helicase
1350989	1362461	11472	Predicted by at least one method	WP_304991944.1		GIY62_RS06250	1359426	1359716	1	hypothetical protein
1350989	1362461	11472	Predicted by at least one method	WP_304991945.1		GIY62_RS06255	1359965	1360447	-1	hypothetical protein
1350989	1362461	11472	Predicted by at least one method	WP_304991946.1		GIY62_RS06260	1361007	1361207	-1	hypothetical protein
1350989	1362461	11472	Predicted by at least one method	WP_304991947.1		GIY62_RS06265	1361277	1361741	1	helix-turn-helix transcriptional regulator
1350989	1362461	11472	Predicted by at least one method	WP_304991948.1		GIY62_RS06270	1362132	1362461	1	hypothetical protein
1366818	1372675	5857	Predicted by at least one method	WP_304991956.1		GIY62_RS06315	1366818	1367588	1	PRTRC system ThiF family protein
1366818	1372675	5857	Predicted by at least one method	WP_304991957.1		GIY62_RS06320	1367589	1368410	1	ParB N-terminal domain-containing protein
1366818	1372675	5857	Predicted by at least one method	WP_304991958.1		GIY62_RS06325	1368403	1368726	1	hypothetical protein
1366818	1372675	5857	Predicted by at least one method	WP_304991959.1		GIY62_RS06330	1368750	1369469	1	hypothetical protein
1366818	1372675	5857	Predicted by at least one method	WP_304991960.1		GIY62_RS06335	1369462	1369788	1	hypothetical protein
1366818	1372675	5857	Predicted by at least one method	WP_304991961.1		GIY62_RS06340	1369973	1370269	1	hypothetical protein
1366818	1372675	5857	Predicted by at least one method	WP_304991962.1		GIY62_RS06345	1370266	1370616	1	DUF4031 domain-containing protein
1366818	1372675	5857	Predicted by at least one method	WP_304991963.1		GIY62_RS06350	1370618	1370854	1	hypothetical protein
1366818	1372675	5857	Predicted by at least one method	WP_304991964.1		GIY62_RS06355	1370892	1371575	-1	DUF4145 domain-containing protein
1366818	1372675	5857	Predicted by at least one method	WP_304991965.1		GIY62_RS06360	1371572	1372675	-1	site-specific integrase
1398795	1422029	23234	Predicted by at least one method	WP_304991990.1		GIY62_RS06510	1398322	1398798	-1	hypothetical protein
1398795	1422029	23234	Predicted by at least one method	WP_304991991.1		GIY62_RS06515	1398795	1400591	-1	toprim domain-containing protein
1398795	1422029	23234	Predicted by at least one method	WP_304991992.1		GIY62_RS06520	1400588	1401622	-1	hypothetical protein
1398795	1422029	23234	Predicted by at least one method	WP_304991993.1		GIY62_RS06525	1401615	1401947	-1	hypothetical protein
1398795	1422029	23234	Predicted by at least one method	WP_304991994.1		GIY62_RS06530	1402214	1402459	-1	transcriptional regulator
1398795	1422029	23234	Predicted by at least one method	WP_304991995.1		GIY62_RS06535	1402556	1403068	1	Arc family DNA-binding protein
1398795	1422029	23234	Predicted by at least one method	WP_304991996.1		GIY62_RS06540	1403364	1403636	-1	hypothetical protein
1398795	1422029	23234	Predicted by at least one method	WP_304991997.1		GIY62_RS06545	1403629	1403952	-1	hypothetical protein
1398795	1422029	23234	Predicted by at least one method	WP_304991998.1		GIY62_RS06550	1403945	1404328	-1	hypothetical protein
1398795	1422029	23234	Predicted by at least one method	WP_304991999.1		GIY62_RS06555	1404321	1404458	-1	hypothetical protein
1398795	1422029	23234	Predicted by at least one method	WP_304992000.1		GIY62_RS06560	1405025	1405549	1	excisionase
1398795	1422029	23234	Predicted by at least one method	WP_304992001.1		GIY62_RS06565	1405565	1406134	-1	hypothetical protein
1398795	1422029	23234	Predicted by at least one method	WP_304992002.1		GIY62_RS06570	1406150	1406626	-1	AlpA family transcriptional regulator
1398795	1422029	23234	Predicted by at least one method	WP_304992003.1		GIY62_RS06575	1406837	1407352	-1	hypothetical protein
1398795	1422029	23234	Predicted by at least one method	WP_304992004.1		GIY62_RS06580	1407455	1407793	-1	hypothetical protein
1398795	1422029	23234	Predicted by at least one method	WP_304992005.1		GIY62_RS06585	1407914	1408108	-1	type II toxin-antitoxin system HicA family toxin
1398795	1422029	23234	Predicted by at least one method	WP_304992006.1		GIY62_RS06590	1408114	1408347	-1	DUF1902 domain-containing protein
1398795	1422029	23234	Predicted by at least one method	WP_304992007.1		GIY62_RS06595	1408895	1409113	-1	hypothetical protein
1398795	1422029	23234	Predicted by at least one method	WP_304992008.1		GIY62_RS06600	1409247	1409702	-1	hypothetical protein
1398795	1422029	23234	Predicted by at least one method	WP_304992009.1		GIY62_RS06605	1409858	1410910	1	hypothetical protein
1398795	1422029	23234	Predicted by at least one method	WP_304992010.1		GIY62_RS06610	1411840	1413504	1	hypothetical protein
1398795	1422029	23234	Predicted by at least one method	WP_304992011.1		GIY62_RS06615	1413590	1414372	-1	PDZ domain-containing protein
1398795	1422029	23234	Predicted by at least one method	WP_304992012.1		GIY62_RS06620	1414698	1416353	1	ABC transporter substrate-binding protein
1398795	1422029	23234	Predicted by at least one method	WP_304992013.1		GIY62_RS06625	1416451	1416945	-1	hypothetical protein
1398795	1422029	23234	Predicted by at least one method	WP_052498347.1		GIY62_RS06630	1417133	1417513	-1	DUF3592 domain-containing protein
1398795	1422029	23234	Predicted by at least one method	WP_042625710.1		GIY62_RS06635	1417645	1417914	1	hypothetical protein
1398795	1422029	23234	Predicted by at least one method	WP_042625711.1		GIY62_RS06640	1418044	1418253	1	hypothetical protein
1398795	1422029	23234	Predicted by at least one method	WP_304992014.1	pbpG	GIY62_RS06645	1418348	1419547	1	D-alanyl-D-alanine endopeptidase
1398795	1422029	23234	Predicted by at least one method	WP_304992015.1	eco	GIY62_RS06650	1419596	1420132	-1	serine protease inhibitor ecotin
1398795	1422029	23234	Predicted by at least one method	WP_304992016.1		GIY62_RS06655	1420398	1420829	1	hypothetical protein
1398795	1422029	23234	Predicted by at least one method	WP_304992017.1		GIY62_RS06660	1421096	1421443	-1	ecotin precursor
1398795	1422029	23234	Predicted by at least one method	WP_042625713.1		GIY62_RS06665	1421649	1422029	1	DUF5594 family protein
2382547	2402508	19961	Predicted by at least one method	WP_304990807.1		GIY62_RS10840	2382547	2385321	1	type VI secretion system Vgr family protein
2382547	2402508	19961	Predicted by at least one method	WP_304990808.1		GIY62_RS10845	2385318	2386790	1	hypothetical protein
2382547	2402508	19961	Predicted by at least one method	WP_304990809.1		GIY62_RS10850	2386787	2387863	1	Imm72 family immunity protein
2382547	2402508	19961	Predicted by at least one method	WP_304990810.1		GIY62_RS10855	2388149	2389201	1	hypothetical protein
2382547	2402508	19961	Predicted by at least one method	WP_304990811.1		GIY62_RS10860	2389370	2390175	1	IS5 family transposase
2382547	2402508	19961	Predicted by at least one method	WP_304990812.1		GIY62_RS10865	2390211	2392151	-1	hypothetical protein
2382547	2402508	19961	Predicted by at least one method	WP_304990813.1		GIY62_RS10870	2392148	2394601	-1	sensor histidine kinase
2382547	2402508	19961	Predicted by at least one method	WP_041745886.1		GIY62_RS10875	2394617	2395447	-1	phosphoadenosine phosphosulfate reductase family protein
2382547	2402508	19961	Predicted by at least one method	WP_304990814.1		GIY62_RS10880	2395422	2398880	-1	hypothetical protein
2382547	2402508	19961	Predicted by at least one method	WP_304990815.1		GIY62_RS10885	2398873	2399781	-1	DUF4007 family protein
2382547	2402508	19961	Predicted by at least one method	WP_304990816.1		GIY62_RS10890	2400160	2400965	-1	IS5 family transposase
2382547	2402508	19961	Predicted by at least one method	WP_304990817.1		GIY62_RS10895	2401369	2402508	-1	site-specific integrase
3137178	3144035	6857	Predicted by at least one method	WP_304991001.1		GIY62_RS14255	3137178	3137843	1	hypothetical protein
3137178	3144035	6857	Predicted by at least one method	WP_304991002.1		GIY62_RS14260	3137827	3139038	1	XRE family transcriptional regulator
3137178	3144035	6857	Predicted by at least one method	WP_304991003.1		GIY62_RS14265	3139222	3139869	-1	hypothetical protein
3137178	3144035	6857	Predicted by at least one method	WP_304991004.1		GIY62_RS14270	3139866	3140768	-1	DUF4747 family protein
3137178	3144035	6857	Predicted by at least one method	WP_304991005.1		GIY62_RS14275	3141056	3141286	1	hypothetical protein
3137178	3144035	6857	Predicted by at least one method	WP_304992295.1		GIY62_RS14280	3141292	3141534	-1	HNH endonuclease
3137178	3144035	6857	Predicted by at least one method	WP_083294900.1		GIY62_RS14285	3142087	3142536	1	DUF3304 domain-containing protein
3137178	3144035	6857	Predicted by at least one method	WP_304991006.1		GIY62_RS14290	3142533	3144035	1	DUF2235 domain-containing protein
3180356	3185242	4886	Predicted by at least one method	WP_304991020.1		GIY62_RS14470	3180356	3181369	1	phosphatidylinositol-specific phospholipase C domain-containing protein
3180356	3185242	4886	Predicted by at least one method			GIY62_RS14475	3181500	3182085	1	transposase
3180356	3185242	4886	Predicted by at least one method	WP_304991021.1		GIY62_RS14480	3182428	3184041	-1	DUF2235 domain-containing protein
3180356	3185242	4886	Predicted by at least one method	WP_304991022.1		GIY62_RS14485	3184059	3184610	-1	DUF3304 domain-containing protein
3180356	3185242	4886	Predicted by at least one method	WP_304991023.1		GIY62_RS14490	3184628	3185242	-1	DUF3304 domain-containing protein
3223285	3228494	5209	Predicted by at least one method	WP_304991036.1		GIY62_RS14670	3223062	3223292	-1	hypothetical protein
3223285	3228494	5209	Predicted by at least one method	WP_304991037.1		GIY62_RS14675	3223285	3223794	-1	hypothetical protein
3223285	3228494	5209	Predicted by at least one method	WP_304991038.1		GIY62_RS14680	3223787	3224005	-1	hypothetical protein
3223285	3228494	5209	Predicted by at least one method	WP_304991039.1		GIY62_RS14685	3223998	3224258	-1	hypothetical protein
3223285	3228494	5209	Predicted by at least one method	WP_304991040.1		GIY62_RS14690	3224251	3224643	-1	hypothetical protein
3223285	3228494	5209	Predicted by at least one method	WP_304991041.1		GIY62_RS14695	3224636	3225043	-1	hypothetical protein
3223285	3228494	5209	Predicted by at least one method	WP_304991042.1		GIY62_RS14700	3225091	3226026	-1	hypothetical protein
3223285	3228494	5209	Predicted by at least one method	WP_304991043.1		GIY62_RS14705	3226078	3226266	-1	hypothetical protein
3223285	3228494	5209	Predicted by at least one method	WP_304991044.1		GIY62_RS14710	3226357	3226998	1	helix-turn-helix domain-containing protein
3223285	3228494	5209	Predicted by at least one method	WP_304991045.1		GIY62_RS14715	3227140	3227916	-1	S24 family peptidase
3223285	3228494	5209	Predicted by at least one method	WP_304991046.1		GIY62_RS14720	3228022	3228255	1	helix-turn-helix transcriptional regulator
3223285	3228494	5209	Predicted by at least one method	WP_304991047.1		GIY62_RS14725	3228252	3228494	1	hypothetical protein
3223285	3228494	5209	Predicted by at least one method	WP_304991048.1		GIY62_RS14730	3228491	3229516	1	helix-turn-helix domain-containing protein
3789847	3864887	75040	Predicted by at least one method	WP_304991242.1	tssI	GIY62_RS17230	3789847	3792378	1	type VI secretion system tip protein TssI/VgrG
3789847	3864887	75040	Predicted by at least one method	WP_304991243.1		GIY62_RS17235	3792389	3793273	1	DUF4123 domain-containing protein
3789847	3864887	75040	Predicted by at least one method	WP_304991244.1		GIY62_RS17240	3793270	3793797	1	DUF3304 domain-containing protein
3789847	3864887	75040	Predicted by at least one method	WP_304991245.1		GIY62_RS17245	3793957	3794478	1	DUF3304 domain-containing protein
3789847	3864887	75040	Predicted by at least one method	WP_304991246.1		GIY62_RS17250	3794522	3795103	1	DUF3304 domain-containing protein
3789847	3864887	75040	Predicted by at least one method	WP_304991247.1		GIY62_RS17255	3795263	3795784	1	DUF3304 domain-containing protein
3789847	3864887	75040	Predicted by at least one method	WP_304991248.1		GIY62_RS17260	3795797	3798169	1	DUF2235 domain-containing protein
3789847	3864887	75040	Predicted by at least one method	WP_082465212.1		GIY62_RS17265	3798194	3798475	1	PAAR domain-containing protein
3789847	3864887	75040	Predicted by at least one method	WP_304991249.1	tssL	GIY62_RS17270	3798478	3799806	1	type VI secretion system protein TssL, long form
3789847	3864887	75040	Predicted by at least one method	WP_304991250.1		GIY62_RS17275	3799855	3800382	1	hypothetical protein
3789847	3864887	75040	Predicted by at least one method	WP_304991252.1	tssM	GIY62_RS17280	3800687	3804787	1	type VI secretion system membrane subunit TssM
3789847	3864887	75040	Predicted by at least one method	WP_304991253.1	icmH	GIY62_RS17285	3804809	3806023	1	type IVB secretion system protein IcmH/DotU
3789847	3864887	75040	Predicted by at least one method	WP_304991254.1		GIY62_RS17290	3806080	3806874	-1	c-type cytochrome
3789847	3864887	75040	Predicted by at least one method	WP_304991255.1		GIY62_RS17295	3807174	3807893	1	ribonuclease activity regulator RraA
3789847	3864887	75040	Predicted by at least one method	WP_304991256.1		GIY62_RS17300	3807960	3809144	-1	FUSC family protein
3789847	3864887	75040	Predicted by at least one method	WP_304991257.1		GIY62_RS17305	3809371	3810516	-1	NAD(P)/FAD-dependent oxidoreductase
3789847	3864887	75040	Predicted by at least one method	WP_055139467.1		GIY62_RS17310	3810624	3811304	1	TetR family transcriptional regulator
3789847	3864887	75040	Predicted by at least one method	WP_304991258.1		GIY62_RS17315	3811335	3811973	1	DUF4442 domain-containing protein
3789847	3864887	75040	Predicted by at least one method	WP_304991259.1		GIY62_RS17320	3812089	3813213	-1	tetratricopeptide repeat protein
3789847	3864887	75040	Predicted by at least one method	WP_304991260.1		GIY62_RS17325	3813441	3827834	1	LysM peptidoglycan-binding domain-containing protein
3789847	3864887	75040	Predicted by at least one method	WP_304991261.1		GIY62_RS17330	3827824	3828252	1	hypothetical protein
3789847	3864887	75040	Predicted by at least one method	WP_304991262.1		GIY62_RS17335	3828322	3828453	-1	hypothetical protein
3789847	3864887	75040	Predicted by at least one method			GIY62_RS17340	3828594	3829091	1	transposase
3789847	3864887	75040	Predicted by at least one method	WP_304991263.1		GIY62_RS17345	3829351	3829659	-1	hypothetical protein
3789847	3864887	75040	Predicted by at least one method	WP_304991264.1		GIY62_RS17350	3829868	3830182	1	DUF1153 domain-containing protein
3789847	3864887	75040	Predicted by at least one method	WP_304991265.1		GIY62_RS17355	3830179	3831000	1	IS3 family transposase
3789847	3864887	75040	Predicted by at least one method	WP_304991266.1		GIY62_RS17360	3831225	3831713	1	hypothetical protein
3789847	3864887	75040	Predicted by at least one method	WP_304991267.1		GIY62_RS17365	3831924	3833021	1	IS5 family transposase
3789847	3864887	75040	Predicted by at least one method	WP_304991268.1		GIY62_RS17370	3833067	3833459	1	hypothetical protein
3789847	3864887	75040	Predicted by at least one method	WP_304991269.1		GIY62_RS17375	3833456	3833956	1	hypothetical protein
3789847	3864887	75040	Predicted by at least one method	WP_304991270.1		GIY62_RS17380	3833963	3835189	1	hypothetical protein
3789847	3864887	75040	Predicted by at least one method	WP_304991271.1		GIY62_RS17385	3835223	3836027	1	IS5 family transposase
3789847	3864887	75040	Predicted by at least one method	WP_304991272.1		GIY62_RS17390	3836041	3836316	1	hypothetical protein
3789847	3864887	75040	Predicted by at least one method	WP_304991273.1		GIY62_RS17395	3836360	3837469	1	DNA/RNA non-specific endonuclease
3789847	3864887	75040	Predicted by at least one method	WP_304991274.1		GIY62_RS17400	3837897	3838451	1	hypothetical protein
3789847	3864887	75040	Predicted by at least one method	WP_304991275.1		GIY62_RS17405	3838497	3839096	1	hypothetical protein
3789847	3864887	75040	Predicted by at least one method	WP_304991276.1		GIY62_RS17410	3839099	3839503	1	hypothetical protein
3789847	3864887	75040	Predicted by at least one method	WP_304991277.1		GIY62_RS17415	3839543	3840394	1	hypothetical protein
3789847	3864887	75040	Predicted by at least one method	WP_304991278.1		GIY62_RS17420	3840731	3841135	1	hypothetical protein
3789847	3864887	75040	Predicted by at least one method	WP_304991279.1		GIY62_RS17425	3841247	3842119	1	polymorphic toxin type 43 domain-containing protein
3789847	3864887	75040	Predicted by at least one method			GIY62_RS17430	3842148	3843236	1	IS3 family transposase
3789847	3864887	75040	Predicted by at least one method	WP_304991280.1		GIY62_RS17435	3843280	3843741	1	hypothetical protein
3789847	3864887	75040	Predicted by at least one method	WP_304991281.1		GIY62_RS17440	3843810	3844139	-1	hypothetical protein
3789847	3864887	75040	Predicted by at least one method	WP_304991282.1		GIY62_RS17445	3844221	3844529	-1	hypothetical protein
3789847	3864887	75040	Predicted by at least one method	WP_304991283.1		GIY62_RS17450	3844738	3845052	1	DUF1153 domain-containing protein
3789847	3864887	75040	Predicted by at least one method	WP_304991284.1		GIY62_RS17455	3845049	3845870	1	IS3 family transposase
3789847	3864887	75040	Predicted by at least one method	WP_304991285.1		GIY62_RS17460	3846088	3846357	1	hypothetical protein
3789847	3864887	75040	Predicted by at least one method			GIY62_RS17465	3846399	3847510	-1	IS3 family transposase
3789847	3864887	75040	Predicted by at least one method	WP_304991286.1		GIY62_RS17470	3847603	3849414	1	LysM domain-containing protein
3789847	3864887	75040	Predicted by at least one method	WP_304991287.1		GIY62_RS17475	3849411	3849713	1	hypothetical protein
3789847	3864887	75040	Predicted by at least one method	WP_304991288.1		GIY62_RS17480	3849710	3850156	1	hypothetical protein
3789847	3864887	75040	Predicted by at least one method			GIY62_RS17485	3850400	3851509	-1	IS3 family transposase
3789847	3864887	75040	Predicted by at least one method	WP_304991289.1		GIY62_RS17490	3851724	3851972	1	hypothetical protein
3789847	3864887	75040	Predicted by at least one method	WP_304991290.1		GIY62_RS17495	3852023	3852385	1	hypothetical protein
3789847	3864887	75040	Predicted by at least one method	WP_304991291.1		GIY62_RS17500	3852719	3855796	1	LysM peptidoglycan-binding domain-containing protein
3789847	3864887	75040	Predicted by at least one method	WP_148653949.1		GIY62_RS17505	3855801	3856118	1	hypothetical protein
3789847	3864887	75040	Predicted by at least one method			GIY62_RS17510	3856403	3857070	1	integrase core domain-containing protein
3789847	3864887	75040	Predicted by at least one method	WP_304991292.1		GIY62_RS17515	3857288	3857833	1	DUF4410 domain-containing protein
3789847	3864887	75040	Predicted by at least one method	WP_304991293.1		GIY62_RS17520	3858054	3858413	-1	hypothetical protein
3789847	3864887	75040	Predicted by at least one method	WP_304991294.1		GIY62_RS17525	3858432	3859019	-1	hypothetical protein
3789847	3864887	75040	Predicted by at least one method	WP_304991295.1		GIY62_RS17530	3859028	3859813	-1	sigma-70 family RNA polymerase sigma factor
3789847	3864887	75040	Predicted by at least one method	WP_304991296.1	fliP	GIY62_RS17535	3859810	3860601	-1	flagellar type III secretion system pore protein FliP
3789847	3864887	75040	Predicted by at least one method	WP_052498280.1		GIY62_RS17540	3860603	3860953	-1	flagellar biosynthetic protein FliO
3789847	3864887	75040	Predicted by at least one method	WP_042624530.1		GIY62_RS17545	3860950	3861282	-1	FliM/FliN family flagellar motor switch protein
3789847	3864887	75040	Predicted by at least one method	WP_304991297.1		GIY62_RS17550	3861279	3862082	-1	FliM/FliN family flagellar motor C-terminal domain-containing protein
3789847	3864887	75040	Predicted by at least one method	WP_304991298.1		GIY62_RS17555	3862079	3863272	-1	flagellar hook-basal body complex protein
3789847	3864887	75040	Predicted by at least one method	WP_042624533.1		GIY62_RS17560	3863295	3863708	-1	flagellar hook capping FlgD N-terminal domain-containing protein
3789847	3864887	75040	Predicted by at least one method	WP_304991299.1		GIY62_RS17565	3863698	3864438	-1	hypothetical protein
3789847	3864887	75040	Predicted by at least one method	WP_304991300.1		GIY62_RS17570	3864435	3864887	-1	hypothetical protein
3789847	3864887	75040	Predicted by at least one method	WP_304991301.1		GIY62_RS17575	3864884	3866209	-1	FliI/YscN family ATPase
3789847	3800382	10535	Predicted by at least one method	WP_304991242.1	tssI	GIY62_RS17230	3789847	3792378	1	type VI secretion system tip protein TssI/VgrG
3789847	3800382	10535	Predicted by at least one method	WP_304991243.1		GIY62_RS17235	3792389	3793273	1	DUF4123 domain-containing protein
3789847	3800382	10535	Predicted by at least one method	WP_304991244.1		GIY62_RS17240	3793270	3793797	1	DUF3304 domain-containing protein
3789847	3800382	10535	Predicted by at least one method	WP_304991245.1		GIY62_RS17245	3793957	3794478	1	DUF3304 domain-containing protein
3789847	3800382	10535	Predicted by at least one method	WP_304991246.1		GIY62_RS17250	3794522	3795103	1	DUF3304 domain-containing protein
3789847	3800382	10535	Predicted by at least one method	WP_304991247.1		GIY62_RS17255	3795263	3795784	1	DUF3304 domain-containing protein
3789847	3800382	10535	Predicted by at least one method	WP_304991248.1		GIY62_RS17260	3795797	3798169	1	DUF2235 domain-containing protein
3789847	3800382	10535	Predicted by at least one method	WP_082465212.1		GIY62_RS17265	3798194	3798475	1	PAAR domain-containing protein
3789847	3800382	10535	Predicted by at least one method	WP_304991249.1	tssL	GIY62_RS17270	3798478	3799806	1	type VI secretion system protein TssL, long form
3789847	3800382	10535	Predicted by at least one method	WP_304991250.1		GIY62_RS17275	3799855	3800382	1	hypothetical protein
3827824	3858413	30589	Predicted by at least one method	WP_304991260.1		GIY62_RS17325	3813441	3827834	1	LysM peptidoglycan-binding domain-containing protein
3827824	3858413	30589	Predicted by at least one method	WP_304991261.1		GIY62_RS17330	3827824	3828252	1	hypothetical protein
3827824	3858413	30589	Predicted by at least one method	WP_304991262.1		GIY62_RS17335	3828322	3828453	-1	hypothetical protein
3827824	3858413	30589	Predicted by at least one method			GIY62_RS17340	3828594	3829091	1	transposase
3827824	3858413	30589	Predicted by at least one method	WP_304991263.1		GIY62_RS17345	3829351	3829659	-1	hypothetical protein
3827824	3858413	30589	Predicted by at least one method	WP_304991264.1		GIY62_RS17350	3829868	3830182	1	DUF1153 domain-containing protein
3827824	3858413	30589	Predicted by at least one method	WP_304991265.1		GIY62_RS17355	3830179	3831000	1	IS3 family transposase
3827824	3858413	30589	Predicted by at least one method	WP_304991266.1		GIY62_RS17360	3831225	3831713	1	hypothetical protein
3827824	3858413	30589	Predicted by at least one method	WP_304991267.1		GIY62_RS17365	3831924	3833021	1	IS5 family transposase
3827824	3858413	30589	Predicted by at least one method	WP_304991268.1		GIY62_RS17370	3833067	3833459	1	hypothetical protein
3827824	3858413	30589	Predicted by at least one method	WP_304991269.1		GIY62_RS17375	3833456	3833956	1	hypothetical protein
3827824	3858413	30589	Predicted by at least one method	WP_304991270.1		GIY62_RS17380	3833963	3835189	1	hypothetical protein
3827824	3858413	30589	Predicted by at least one method	WP_304991271.1		GIY62_RS17385	3835223	3836027	1	IS5 family transposase
3827824	3858413	30589	Predicted by at least one method	WP_304991272.1		GIY62_RS17390	3836041	3836316	1	hypothetical protein
3827824	3858413	30589	Predicted by at least one method	WP_304991273.1		GIY62_RS17395	3836360	3837469	1	DNA/RNA non-specific endonuclease
3827824	3858413	30589	Predicted by at least one method	WP_304991274.1		GIY62_RS17400	3837897	3838451	1	hypothetical protein
3827824	3858413	30589	Predicted by at least one method	WP_304991275.1		GIY62_RS17405	3838497	3839096	1	hypothetical protein
3827824	3858413	30589	Predicted by at least one method	WP_304991276.1		GIY62_RS17410	3839099	3839503	1	hypothetical protein
3827824	3858413	30589	Predicted by at least one method	WP_304991277.1		GIY62_RS17415	3839543	3840394	1	hypothetical protein
3827824	3858413	30589	Predicted by at least one method	WP_304991278.1		GIY62_RS17420	3840731	3841135	1	hypothetical protein
3827824	3858413	30589	Predicted by at least one method	WP_304991279.1		GIY62_RS17425	3841247	3842119	1	polymorphic toxin type 43 domain-containing protein
3827824	3858413	30589	Predicted by at least one method			GIY62_RS17430	3842148	3843236	1	IS3 family transposase
3827824	3858413	30589	Predicted by at least one method	WP_304991280.1		GIY62_RS17435	3843280	3843741	1	hypothetical protein
3827824	3858413	30589	Predicted by at least one method	WP_304991281.1		GIY62_RS17440	3843810	3844139	-1	hypothetical protein
3827824	3858413	30589	Predicted by at least one method	WP_304991282.1		GIY62_RS17445	3844221	3844529	-1	hypothetical protein
3827824	3858413	30589	Predicted by at least one method	WP_304991283.1		GIY62_RS17450	3844738	3845052	1	DUF1153 domain-containing protein
3827824	3858413	30589	Predicted by at least one method	WP_304991284.1		GIY62_RS17455	3845049	3845870	1	IS3 family transposase
3827824	3858413	30589	Predicted by at least one method	WP_304991285.1		GIY62_RS17460	3846088	3846357	1	hypothetical protein
3827824	3858413	30589	Predicted by at least one method			GIY62_RS17465	3846399	3847510	-1	IS3 family transposase
3827824	3858413	30589	Predicted by at least one method	WP_304991286.1		GIY62_RS17470	3847603	3849414	1	LysM domain-containing protein
3827824	3858413	30589	Predicted by at least one method	WP_304991287.1		GIY62_RS17475	3849411	3849713	1	hypothetical protein
3827824	3858413	30589	Predicted by at least one method	WP_304991288.1		GIY62_RS17480	3849710	3850156	1	hypothetical protein
3827824	3858413	30589	Predicted by at least one method			GIY62_RS17485	3850400	3851509	-1	IS3 family transposase
3827824	3858413	30589	Predicted by at least one method	WP_304991289.1		GIY62_RS17490	3851724	3851972	1	hypothetical protein
3827824	3858413	30589	Predicted by at least one method	WP_304991290.1		GIY62_RS17495	3852023	3852385	1	hypothetical protein
3827824	3858413	30589	Predicted by at least one method	WP_304991291.1		GIY62_RS17500	3852719	3855796	1	LysM peptidoglycan-binding domain-containing protein
3827824	3858413	30589	Predicted by at least one method	WP_148653949.1		GIY62_RS17505	3855801	3856118	1	hypothetical protein
3827824	3858413	30589	Predicted by at least one method			GIY62_RS17510	3856403	3857070	1	integrase core domain-containing protein
3827824	3858413	30589	Predicted by at least one method	WP_304991292.1		GIY62_RS17515	3857288	3857833	1	DUF4410 domain-containing protein
3827824	3858413	30589	Predicted by at least one method	WP_304991293.1		GIY62_RS17520	3858054	3858413	-1	hypothetical protein
3949884	3956762	6878	Predicted by at least one method	WP_042624601.1		GIY62_RS18000	3949884	3951029	1	helix-turn-helix transcriptional regulator
3949884	3956762	6878	Predicted by at least one method	WP_304991338.1		GIY62_RS18005	3951355	3952872	1	hypothetical protein
3949884	3956762	6878	Predicted by at least one method	WP_304991339.1		GIY62_RS18010	3953008	3953439	1	hypothetical protein
3949884	3956762	6878	Predicted by at least one method	WP_304991340.1		GIY62_RS18015	3953645	3954709	1	helix-turn-helix domain-containing protein
3949884	3956762	6878	Predicted by at least one method			GIY62_RS18020	3954755	3955276	-1	transposase
3949884	3956762	6878	Predicted by at least one method	WP_304991341.1		GIY62_RS18025	3955578	3955928	-1	hypothetical protein
3949884	3956762	6878	Predicted by at least one method	WP_304991342.1		GIY62_RS18030	3956067	3956762	1	class I SAM-dependent methyltransferase
4147813	4164854	17041	Predicted by at least one method	WP_141755129.1		GIY62_RS18810	4147813	4148256	1	transposase
4147813	4164854	17041	Predicted by at least one method	WP_226993641.1		GIY62_RS18815	4148390	4148797	-1	DUF2147 domain-containing protein
4147813	4164854	17041	Predicted by at least one method	WP_055138536.1		GIY62_RS18820	4149020	4150702	-1	POTRA domain-containing protein
4147813	4164854	17041	Predicted by at least one method	WP_042624728.1		GIY62_RS18825	4150837	4152201	-1	collagen-like triple helix repeat-containing protein
4147813	4164854	17041	Predicted by at least one method	WP_304991408.1		GIY62_RS18830	4152245	4154185	-1	collagen-like triple helix repeat-containing protein
4147813	4164854	17041	Predicted by at least one method	WP_042624730.1		GIY62_RS18835	4154837	4155022	1	Flp family type IVb pilin
4147813	4164854	17041	Predicted by at least one method	WP_080937144.1		GIY62_RS18840	4155106	4155606	1	prepilin peptidase
4147813	4164854	17041	Predicted by at least one method	WP_042624731.1		GIY62_RS18845	4155603	4156073	1	pilus assembly protein
4147813	4164854	17041	Predicted by at least one method	WP_042624732.1	cpaB	GIY62_RS18850	4156261	4157187	1	Flp pilus assembly protein CpaB
4147813	4164854	17041	Predicted by at least one method	WP_304991409.1		GIY62_RS18855	4157254	4158681	1	type II and III secretion system protein family protein
4147813	4164854	17041	Predicted by at least one method	WP_304991410.1		GIY62_RS18860	4158757	4160004	1	fimbrial protein
4147813	4164854	17041	Predicted by at least one method	WP_042624735.1		GIY62_RS18865	4160008	4161354	1	CpaF family protein
4147813	4164854	17041	Predicted by at least one method	WP_304991411.1		GIY62_RS18870	4161347	4162363	1	type II secretion system F family protein
4147813	4164854	17041	Predicted by at least one method	WP_070106521.1		GIY62_RS18875	4162374	4163366	1	type II secretion system F family protein
4147813	4164854	17041	Predicted by at least one method	WP_042624738.1		GIY62_RS18880	4163401	4164249	1	tetratricopeptide repeat protein
4147813	4164854	17041	Predicted by at least one method	WP_304991412.1		GIY62_RS18885	4164270	4164854	1	DUF3613 domain-containing protein
4468883	4479533	10650	Predicted by at least one method			GIY62_RS20150	4468883	4469390	1	IS701 family transposase
4468883	4479533	10650	Predicted by at least one method	WP_304993043.1		GIY62_RS20155	4469768	4470331	-1	GNAT family N-acetyltransferase
4468883	4479533	10650	Predicted by at least one method	WP_304993044.1		GIY62_RS20160	4470758	4471822	1	retroviral-like aspartic protease family protein
4468883	4479533	10650	Predicted by at least one method	WP_080937368.1		GIY62_RS20165	4472005	4472391	-1	hypothetical protein
4468883	4479533	10650	Predicted by at least one method	WP_055140304.1		GIY62_RS20170	4473211	4473870	-1	pyridoxamine 5'-phosphate oxidase family protein
4468883	4479533	10650	Predicted by at least one method	WP_304993045.1		GIY62_RS20175	4473973	4474755	1	helix-turn-helix transcriptional regulator
4468883	4479533	10650	Predicted by at least one method	WP_304993659.1		GIY62_RS20180	4475055	4476845	1	FAD-binding oxidoreductase
4468883	4479533	10650	Predicted by at least one method	WP_304993046.1		GIY62_RS20185	4477165	4478052	-1	LysR family transcriptional regulator
4468883	4479533	10650	Predicted by at least one method	WP_304993047.1		GIY62_RS20190	4478131	4478766	1	hypothetical protein
4468883	4479533	10650	Predicted by at least one method	WP_304993048.1		GIY62_RS20195	4479207	4479533	1	hypothetical protein
4656862	4661593	4731	Predicted by at least one method			GIY62_RS20970	4656862	4658560	-1	site-specific integrase
4656862	4661593	4731	Predicted by at least one method			GIY62_RS20975	4658685	4659880	1	Tn3 family transposase
4656862	4661593	4731	Predicted by at least one method	WP_304993119.1		GIY62_RS20980	4659972	4661186	1	DUF6402 family protein
4656862	4661593	4731	Predicted by at least one method	WP_198253382.1		GIY62_RS20985	4661183	4661593	1	hypothetical protein
4685223	4690497	5274	Predicted by at least one method	WP_304993132.1		GIY62_RS21095	4685223	4685723	1	DUF3304 domain-containing protein
4685223	4690497	5274	Predicted by at least one method	WP_304993669.1		GIY62_RS21100	4686011	4686292	1	hypothetical protein
4685223	4690497	5274	Predicted by at least one method	WP_304993133.1		GIY62_RS21105	4686310	4686861	1	DUF3304 domain-containing protein
4685223	4690497	5274	Predicted by at least one method	WP_304993134.1		GIY62_RS21110	4686879	4688495	1	DUF2235 domain-containing protein
4685223	4690497	5274	Predicted by at least one method	WP_304993135.1		GIY62_RS21115	4688801	4689352	1	DUF3304 domain-containing protein
4685223	4690497	5274	Predicted by at least one method	WP_304993136.1		GIY62_RS21120	4689371	4689925	1	DUF3304 domain-containing protein
4685223	4690497	5274	Predicted by at least one method	WP_304993137.1		GIY62_RS21125	4689943	4690497	1	DUF3304 domain-containing protein
4770026	4788650	18624	Predicted by at least one method	WP_304993179.1		GIY62_RS21475	4770026	4770421	1	GNAT family N-acetyltransferase
4770026	4788650	18624	Predicted by at least one method	WP_304993180.1		GIY62_RS21480	4770387	4771229	1	hypothetical protein
4770026	4788650	18624	Predicted by at least one method	WP_304993181.1		GIY62_RS21485	4771312	4771557	-1	hypothetical protein
4770026	4788650	18624	Predicted by at least one method	WP_304993182.1		GIY62_RS21490	4771556	4772667	1	IS3 family transposase
4770026	4788650	18624	Predicted by at least one method	WP_123863487.1		GIY62_RS21495	4773221	4774026	-1	IS5 family transposase
4770026	4788650	18624	Predicted by at least one method	WP_304993183.1		GIY62_RS21500	4774332	4775141	1	Rha family transcriptional regulator
4770026	4788650	18624	Predicted by at least one method	WP_304993184.1		GIY62_RS21505	4775174	4775818	-1	DUF2971 domain-containing protein
4770026	4788650	18624	Predicted by at least one method	WP_304993185.1		GIY62_RS21510	4775919	4777397	-1	DUF2075 domain-containing protein
4770026	4788650	18624	Predicted by at least one method		gspG	GIY62_RS21515	4777492	4777809	-1	type II secretion system major pseudopilin GspG
4770026	4788650	18624	Predicted by at least one method			GIY62_RS21520	4777969	4778121	-1	hypothetical protein
4770026	4788650	18624	Predicted by at least one method	WP_304993186.1		GIY62_RS21525	4778186	4778800	-1	hypothetical protein
4770026	4788650	18624	Predicted by at least one method	WP_304993672.1		GIY62_RS21530	4778890	4779522	-1	DarT ssDNA thymidine ADP-ribosyltransferase family protein
4770026	4788650	18624	Predicted by at least one method			GIY62_RS21535	4779604	4779993	-1	SOS response-associated peptidase family protein
4770026	4788650	18624	Predicted by at least one method	WP_042626716.1		GIY62_RS21540	4780413	4780727	1	DUF1153 domain-containing protein
4770026	4788650	18624	Predicted by at least one method	WP_304991634.1		GIY62_RS21545	4780724	4781545	1	IS3 family transposase
4770026	4788650	18624	Predicted by at least one method	WP_104767805.1		GIY62_RS21550	4782177	4782605	-1	hypothetical protein
4770026	4788650	18624	Predicted by at least one method	WP_304993673.1		GIY62_RS21555	4782817	4783068	-1	PAAR domain-containing protein
4770026	4788650	18624	Predicted by at least one method	WP_154817377.1		GIY62_RS21560	4783148	4783516	-1	helix-turn-helix transcriptional regulator
4770026	4788650	18624	Predicted by at least one method	WP_154817376.1		GIY62_RS21565	4783799	4784635	1	hypothetical protein
4770026	4788650	18624	Predicted by at least one method	WP_080466856.1		GIY62_RS21570	4784724	4785143	1	lysozyme inhibitor LprI family protein
4770026	4788650	18624	Predicted by at least one method	WP_062911402.1		GIY62_RS21575	4785383	4785937	1	PAAR domain-containing protein
4770026	4788650	18624	Predicted by at least one method	WP_304993187.1		GIY62_RS21580	4785941	4786561	1	type VI secretion system amidase effector protein Tae4
4770026	4788650	18624	Predicted by at least one method	WP_304993188.1		GIY62_RS21585	4786744	4786899	1	hypothetical protein
4770026	4788650	18624	Predicted by at least one method	WP_081084851.1		GIY62_RS21590	4787526	4788650	-1	tyrosine-type recombinase/integrase
4774332	4783516	9184	Predicted by at least one method	WP_304993183.1		GIY62_RS21500	4774332	4775141	1	Rha family transcriptional regulator
4774332	4783516	9184	Predicted by at least one method	WP_304993184.1		GIY62_RS21505	4775174	4775818	-1	DUF2971 domain-containing protein
4774332	4783516	9184	Predicted by at least one method	WP_304993185.1		GIY62_RS21510	4775919	4777397	-1	DUF2075 domain-containing protein
4774332	4783516	9184	Predicted by at least one method		gspG	GIY62_RS21515	4777492	4777809	-1	type II secretion system major pseudopilin GspG
4774332	4783516	9184	Predicted by at least one method			GIY62_RS21520	4777969	4778121	-1	hypothetical protein
4774332	4783516	9184	Predicted by at least one method	WP_304993186.1		GIY62_RS21525	4778186	4778800	-1	hypothetical protein
4774332	4783516	9184	Predicted by at least one method	WP_304993672.1		GIY62_RS21530	4778890	4779522	-1	DarT ssDNA thymidine ADP-ribosyltransferase family protein
4774332	4783516	9184	Predicted by at least one method			GIY62_RS21535	4779604	4779993	-1	SOS response-associated peptidase family protein
4774332	4783516	9184	Predicted by at least one method	WP_042626716.1		GIY62_RS21540	4780413	4780727	1	DUF1153 domain-containing protein
4774332	4783516	9184	Predicted by at least one method	WP_304991634.1		GIY62_RS21545	4780724	4781545	1	IS3 family transposase
4774332	4783516	9184	Predicted by at least one method	WP_104767805.1		GIY62_RS21550	4782177	4782605	-1	hypothetical protein
4774332	4783516	9184	Predicted by at least one method	WP_304993673.1		GIY62_RS21555	4782817	4783068	-1	PAAR domain-containing protein
4774332	4783516	9184	Predicted by at least one method	WP_154817377.1		GIY62_RS21560	4783148	4783516	-1	helix-turn-helix transcriptional regulator
5167843	5179310	11467	Predicted by at least one method	WP_304993299.1		GIY62_RS22855	5167843	5168559	1	SDR family oxidoreductase
5167843	5179310	11467	Predicted by at least one method	WP_304993300.1		GIY62_RS22860	5168740	5169132	-1	hypothetical protein
5167843	5179310	11467	Predicted by at least one method			GIY62_RS22865	5169834	5170400	-1	SDR family oxidoreductase
5167843	5179310	11467	Predicted by at least one method	WP_304990816.1		GIY62_RS22870	5170407	5171212	-1	IS5 family transposase
5167843	5179310	11467	Predicted by at least one method			GIY62_RS22875	5171266	5171445	-1	SDR family NAD(P)-dependent oxidoreductase
5167843	5179310	11467	Predicted by at least one method	WP_304993301.1		GIY62_RS22880	5171541	5171948	-1	hypothetical protein
5167843	5179310	11467	Predicted by at least one method	WP_304993302.1		GIY62_RS22885	5172166	5173326	1	IS30 family transposase
5167843	5179310	11467	Predicted by at least one method	WP_304993303.1		GIY62_RS22890	5173859	5174623	-1	hypothetical protein
5167843	5179310	11467	Predicted by at least one method	WP_304993304.1		GIY62_RS22895	5174629	5175003	-1	hypothetical protein
5167843	5179310	11467	Predicted by at least one method	WP_304993305.1		GIY62_RS22900	5175739	5176074	1	SymE family type I addiction module toxin
5167843	5179310	11467	Predicted by at least one method	WP_304993306.1		GIY62_RS22905	5176236	5176502	-1	hypothetical protein
5167843	5179310	11467	Predicted by at least one method	WP_070107009.1		GIY62_RS22910	5176572	5177921	-1	MFS transporter
5167843	5179310	11467	Predicted by at least one method	WP_304993685.1		GIY62_RS22915	5178297	5179310	-1	lipase secretion chaperone
5171266	5176502	5236	Predicted by at least one method			GIY62_RS22875	5171266	5171445	-1	SDR family NAD(P)-dependent oxidoreductase
5171266	5176502	5236	Predicted by at least one method	WP_304993301.1		GIY62_RS22880	5171541	5171948	-1	hypothetical protein
5171266	5176502	5236	Predicted by at least one method	WP_304993302.1		GIY62_RS22885	5172166	5173326	1	IS30 family transposase
5171266	5176502	5236	Predicted by at least one method	WP_304993303.1		GIY62_RS22890	5173859	5174623	-1	hypothetical protein
5171266	5176502	5236	Predicted by at least one method	WP_304993304.1		GIY62_RS22895	5174629	5175003	-1	hypothetical protein
5171266	5176502	5236	Predicted by at least one method	WP_304993305.1		GIY62_RS22900	5175739	5176074	1	SymE family type I addiction module toxin
5171266	5176502	5236	Predicted by at least one method	WP_304993306.1		GIY62_RS22905	5176236	5176502	-1	hypothetical protein
5292103	5302238	10135	Predicted by at least one method			GIY62_RS23360	5292103	5292219	1	IS701 family transposase
5292103	5302238	10135	Predicted by at least one method	WP_304993348.1	dsbG	GIY62_RS23365	5293350	5294258	-1	thiol:disulfide interchange protein DsbG
5292103	5302238	10135	Predicted by at least one method			GIY62_RS23370	5294606	5294947	1	DDE-type integrase/transposase/recombinase
5292103	5302238	10135	Predicted by at least one method			GIY62_RS23375	5295007	5295174	1	IS5/IS1182 family transposase
5292103	5302238	10135	Predicted by at least one method	WP_304993349.1		GIY62_RS23380	5295292	5296695	-1	efflux transporter outer membrane subunit
5292103	5302238	10135	Predicted by at least one method	WP_304993350.1		GIY62_RS23385	5297051	5298229	1	efflux RND transporter periplasmic adaptor subunit
5292103	5302238	10135	Predicted by at least one method	WP_304993351.1		GIY62_RS23390	5298219	5300225	1	ATP-binding cassette domain-containing protein
5292103	5302238	10135	Predicted by at least one method			GIY62_RS23395	5300331	5300972	1	DDE-type integrase/transposase/recombinase
5292103	5302238	10135	Predicted by at least one method			GIY62_RS23400	5301031	5301368	-1	type II 3-dehydroquinate dehydratase
5292103	5302238	10135	Predicted by at least one method	WP_304993352.1	aroE	GIY62_RS23405	5301402	5302238	-1	shikimate dehydrogenase
5513003	5522042	9039	Predicted by at least one method	WP_080937467.1		GIY62_RS24320	5513003	5513245	1	hypothetical protein
5513003	5522042	9039	Predicted by at least one method	WP_304993447.1		GIY62_RS24325	5513416	5515074	-1	DUF4236 domain-containing protein
5513003	5522042	9039	Predicted by at least one method	WP_304993448.1		GIY62_RS24330	5515434	5522042	-1	DUF3320 domain-containing protein
5647578	5655665	8087	Predicted by at least one method	WP_304993496.1		GIY62_RS24920	5647578	5648564	-1	cell division protein FtsZ
5647578	5655665	8087	Predicted by at least one method	WP_226993704.1		GIY62_RS24925	5648563	5648886	1	helix-turn-helix transcriptional regulator
5647578	5655665	8087	Predicted by at least one method	WP_304993497.1		GIY62_RS24930	5649264	5650292	-1	extracellular solute-binding protein
5647578	5655665	8087	Predicted by at least one method	WP_304993498.1		GIY62_RS24935	5650289	5651986	-1	ABC transporter permease subunit
5647578	5655665	8087	Predicted by at least one method	WP_059443168.1		GIY62_RS24940	5652504	5652980	1	GNAT family N-acetyltransferase
5647578	5655665	8087	Predicted by at least one method	WP_042628614.1		GIY62_RS24945	5652973	5654007	1	AraC family transcriptional regulator ligand-binding domain-containing protein
5647578	5655665	8087	Predicted by at least one method	WP_055140775.1		GIY62_RS24950	5654479	5654802	1	Arc family DNA-binding protein
5647578	5655665	8087	Predicted by at least one method	WP_304993499.1		GIY62_RS24955	5655165	5655665	1	hypothetical protein
5647578	5655665	8087	Predicted by at least one method	WP_042628616.1		GIY62_RS24960	5655656	5656060	1	OsmC family protein
6121474	6126129	4655	Predicted by at least one method	WP_042628941.1		GIY62_RS27130	6121474	6121683	-1	CbtB domain-containing protein
6121474	6126129	4655	Predicted by at least one method			GIY62_RS27135	6121994	6122186	1	methyl-accepting chemotaxis protein
6121474	6126129	4655	Predicted by at least one method	WP_055140965.1		GIY62_RS27140	6122351	6122770	-1	hypothetical protein
6121474	6126129	4655	Predicted by at least one method	WP_304992340.1		GIY62_RS27145	6122998	6123849	1	helix-turn-helix transcriptional regulator
6121474	6126129	4655	Predicted by at least one method	WP_082465549.1		GIY62_RS27150	6123963	6124535	-1	transcriptional repressor
6121474	6126129	4655	Predicted by at least one method	WP_304992341.1		GIY62_RS27155	6124660	6126129	-1	TolC family protein
6121474	6126129	4655	Predicted by at least one method	WP_304992342.1		GIY62_RS27160	6126116	6129208	-1	efflux RND transporter permease subunit
6131099	6155954	24855	Predicted by at least one method	WP_055140970.1		GIY62_RS27175	6131099	6131671	-1	cupin domain-containing protein
6131099	6155954	24855	Predicted by at least one method			GIY62_RS27180	6131992	6132687	-1	DDE-type integrase/transposase/recombinase
6131099	6155954	24855	Predicted by at least one method	WP_148654245.1		GIY62_RS27185	6132853	6133290	-1	hypothetical protein
6131099	6155954	24855	Predicted by at least one method	WP_304992344.1		GIY62_RS27190	6133539	6134840	1	tetratricopeptide repeat protein
6131099	6155954	24855	Predicted by at least one method	WP_055140972.1		GIY62_RS27195	6134855	6137125	1	TonB-dependent siderophore receptor
6131099	6155954	24855	Predicted by at least one method	WP_304992345.1		GIY62_RS27200	6137132	6137815	1	Fe2+-dependent dioxygenase
6131099	6155954	24855	Predicted by at least one method	WP_304992346.1		GIY62_RS27205	6138097	6138261	1	hypothetical protein
6131099	6155954	24855	Predicted by at least one method			GIY62_RS27210	6138394	6138539	-1	IS110 family transposase
6131099	6155954	24855	Predicted by at least one method	WP_304992347.1		GIY62_RS27215	6138621	6138920	-1	hypothetical protein
6131099	6155954	24855	Predicted by at least one method	WP_304993705.1		GIY62_RS27220	6139088	6140875	1	ABC transporter ATP-binding protein
6131099	6155954	24855	Predicted by at least one method	WP_304992348.1		GIY62_RS27225	6140875	6142617	1	ABC transporter ATP-binding protein
6131099	6155954	24855	Predicted by at least one method	WP_141755259.1		GIY62_RS27230	6142969	6143193	-1	hypothetical protein
6131099	6155954	24855	Predicted by at least one method	WP_304992349.1		GIY62_RS27235	6143323	6144231	-1	transporter
6131099	6155954	24855	Predicted by at least one method	WP_304992350.1		GIY62_RS27240	6145040	6145993	-1	VOC family protein
6131099	6155954	24855	Predicted by at least one method	WP_304992351.1		GIY62_RS27245	6146074	6146910	-1	fumarylacetoacetate hydrolase family protein
6131099	6155954	24855	Predicted by at least one method	WP_304992352.1		GIY62_RS27250	6146962	6147495	-1	cupin domain-containing protein
6131099	6155954	24855	Predicted by at least one method	WP_070107352.1		GIY62_RS27255	6147492	6147977	-1	lipocalin-like domain-containing protein
6131099	6155954	24855	Predicted by at least one method	WP_070107353.1		GIY62_RS27260	6148084	6149499	-1	amidohydrolase family protein
6131099	6155954	24855	Predicted by at least one method	WP_304992353.1		GIY62_RS27265	6149631	6150779	-1	alpha/beta hydrolase family protein
6131099	6155954	24855	Predicted by at least one method	WP_304992354.1		GIY62_RS27270	6150790	6152148	-1	amidohydrolase family protein
6131099	6155954	24855	Predicted by at least one method	WP_304992355.1		GIY62_RS27275	6152475	6154040	-1	bifunctional 3-(3-hydroxy-phenyl)propionate/3-hydroxycinnamic acid hydroxylase
6131099	6155954	24855	Predicted by at least one method	WP_141755260.1		GIY62_RS27280	6154267	6154974	1	TetR/AcrR family transcriptional regulator
6131099	6155954	24855	Predicted by at least one method	WP_304992356.1		GIY62_RS27285	6155154	6155954	1	AraC family transcriptional regulator ligand-binding domain-containing protein
6473721	6497424	23703	Predicted by at least one method	WP_304992463.1		GIY62_RS28620	6473721	6475067	-1	aspartate aminotransferase family protein
6473721	6497424	23703	Predicted by at least one method	WP_304992464.1		GIY62_RS28625	6475147	6476181	-1	C45 family peptidase
6473721	6497424	23703	Predicted by at least one method	WP_304992465.1		GIY62_RS28630	6476349	6476534	-1	hypothetical protein
6473721	6497424	23703	Predicted by at least one method	WP_304993713.1		GIY62_RS28635	6476693	6477394	-1	phosphorylase
6473721	6497424	23703	Predicted by at least one method	WP_304992466.1	shc	GIY62_RS28640	6477401	6479752	-1	squalene--hopene cyclase
6473721	6497424	23703	Predicted by at least one method	WP_042629181.1	hpnD	GIY62_RS28645	6480328	6481176	-1	presqualene diphosphate synthase HpnD
6473721	6497424	23703	Predicted by at least one method	WP_042629182.1		GIY62_RS28650	6481367	6481699	-1	hypothetical protein
6473721	6497424	23703	Predicted by at least one method	WP_042629183.1		GIY62_RS28655	6482106	6483032	1	alpha/beta fold hydrolase
6473721	6497424	23703	Predicted by at least one method	WP_304993714.1		GIY62_RS28660	6483271	6485562	1	ATP-binding protein
6473721	6497424	23703	Predicted by at least one method	WP_042629184.1		GIY62_RS28665	6485683	6486243	-1	NAD(P)H-dependent oxidoreductase
6473721	6497424	23703	Predicted by at least one method	WP_304992467.1	arsC	GIY62_RS28670	6486667	6487023	-1	arsenate reductase (glutaredoxin)
6473721	6497424	23703	Predicted by at least one method	WP_042626797.1	parA	GIY62_RS28675	6487710	6488372	1	ParA family partition ATPase
6473721	6497424	23703	Predicted by at least one method	WP_042626798.1		GIY62_RS28680	6488397	6489446	1	ParB/RepB/Spo0J family partition protein
6473721	6497424	23703	Predicted by at least one method	WP_042626799.1		GIY62_RS28685	6489977	6491356	-1	replication initiation protein
6473721	6497424	23703	Predicted by at least one method	WP_304992468.1		GIY62_RS28690	6493828	6495018	1	DNA-binding protein
6473721	6497424	23703	Predicted by at least one method	WP_042626802.1		GIY62_RS28695	6495110	6496153	-1	tyrosine-type recombinase/integrase
6473721	6497424	23703	Predicted by at least one method	WP_042626803.1		GIY62_RS28700	6496287	6496673	-1	DUF2471 family protein
6473721	6497424	23703	Predicted by at least one method	WP_042626804.1		GIY62_RS28705	6496819	6497424	-1	XRE family transcriptional regulator
6855605	6864519	8914	Predicted by at least one method	WP_304992577.1		GIY62_RS30225	6855605	6855796	-1	hypothetical protein
6855605	6864519	8914	Predicted by at least one method	WP_304992578.1		GIY62_RS30230	6856054	6856632	-1	hypothetical protein
6855605	6864519	8914	Predicted by at least one method			GIY62_RS30235	6856773	6857361	-1	IS6 family transposase
6855605	6864519	8914	Predicted by at least one method	WP_141755287.1		GIY62_RS30240	6857678	6858352	1	hypothetical protein
6855605	6864519	8914	Predicted by at least one method	WP_304992579.1		GIY62_RS30245	6858556	6859530	-1	transporter
6855605	6864519	8914	Predicted by at least one method	WP_082465361.1		GIY62_RS30250	6860395	6860583	-1	rubredoxin
6855605	6864519	8914	Predicted by at least one method	WP_304992580.1		GIY62_RS30255	6860707	6862116	-1	aldehyde dehydrogenase family protein
6855605	6864519	8914	Predicted by at least one method	WP_304992581.1		GIY62_RS30260	6862153	6863244	-1	oxygenase MpaB family protein
6855605	6864519	8914	Predicted by at least one method			GIY62_RS30265	6863822	6864519	-1	IS6 family transposase
7202733	7222191	19458	Predicted by at least one method	WP_042627249.1		GIY62_RS31685	7202733	7203245	-1	DUF4019 domain-containing protein
7202733	7222191	19458	Predicted by at least one method	WP_304992706.1		GIY62_RS31690	7203297	7204448	-1	DUF2827 domain-containing protein
7202733	7222191	19458	Predicted by at least one method	WP_055139864.1		GIY62_RS31695	7204471	7205616	-1	DUF2827 domain-containing protein
7202733	7222191	19458	Predicted by at least one method	WP_244132011.1		GIY62_RS31700	7205613	7207148	-1	YadA-like family protein
7202733	7222191	19458	Predicted by at least one method	WP_304992707.1		GIY62_RS31705	7207033	7217985	1	hypothetical protein
7202733	7222191	19458	Predicted by at least one method	WP_123863689.1		GIY62_RS31710	7218076	7218390	1	hypothetical protein
7202733	7222191	19458	Predicted by at least one method	WP_304991524.1		GIY62_RS31715	7218894	7220354	1	ISNCY family transposase
7202733	7222191	19458	Predicted by at least one method	WP_304992708.1		GIY62_RS31720	7220534	7220782	-1	hypothetical protein
7202733	7222191	19458	Predicted by at least one method	WP_042629278.1		GIY62_RS31725	7220965	7221864	-1	hypothetical protein
7202733	7222191	19458	Predicted by at least one method	WP_042627252.1		GIY62_RS31730	7221976	7222191	-1	hypothetical protein
7207033	7220782	13749	Predicted by at least one method	WP_244132011.1		GIY62_RS31700	7205613	7207148	-1	YadA-like family protein
7207033	7220782	13749	Predicted by at least one method	WP_304992707.1		GIY62_RS31705	7207033	7217985	1	hypothetical protein
7207033	7220782	13749	Predicted by at least one method	WP_123863689.1		GIY62_RS31710	7218076	7218390	1	hypothetical protein
7207033	7220782	13749	Predicted by at least one method	WP_304991524.1		GIY62_RS31715	7218894	7220354	1	ISNCY family transposase
7207033	7220782	13749	Predicted by at least one method	WP_304992708.1		GIY62_RS31720	7220534	7220782	-1	hypothetical protein
7573174	7605507	32333	Predicted by at least one method	WP_080937366.1		GIY62_RS33215	7573174	7574073	1	DapH/DapD/GlmU-related protein
7573174	7605507	32333	Predicted by at least one method	WP_304990950.1		GIY62_RS33220	7574090	7575055	-1	IS110 family transposase
7573174	7605507	32333	Predicted by at least one method	WP_304992833.1		GIY62_RS33225	7575466	7576002	1	hypothetical protein
7573174	7605507	32333	Predicted by at least one method	WP_304992834.1		GIY62_RS33230	7576209	7576784	1	hypothetical protein
7573174	7605507	32333	Predicted by at least one method	WP_304992835.1		GIY62_RS33235	7576989	7577555	-1	hypothetical protein
7573174	7605507	32333	Predicted by at least one method			GIY62_RS33240	7577818	7578793	-1	IS481 family transposase
7573174	7605507	32333	Predicted by at least one method	WP_304992836.1		GIY62_RS33245	7578964	7579781	-1	IS5 family transposase
7573174	7605507	32333	Predicted by at least one method			GIY62_RS33250	7579894	7580274	1	transposase
7573174	7605507	32333	Predicted by at least one method	WP_042627474.1		GIY62_RS33255	7580281	7580955	-1	TetR family transcriptional regulator
7573174	7605507	32333	Predicted by at least one method	WP_070106056.1		GIY62_RS33260	7581031	7581864	1	GNAT family N-acetyltransferase
7573174	7605507	32333	Predicted by at least one method	WP_304992837.1		GIY62_RS33265	7582007	7582803	-1	IS5 family transposase
7573174	7605507	32333	Predicted by at least one method	WP_304992838.1		GIY62_RS33270	7583452	7585554	1	filamentous hemagglutinin N-terminal domain-containing protein
7573174	7605507	32333	Predicted by at least one method	WP_070106053.1		GIY62_RS33275	7585551	7587317	1	ShlB/FhaC/HecB family hemolysin secretion/activation protein
7573174	7605507	32333	Predicted by at least one method	WP_070106052.1		GIY62_RS33280	7587334	7588293	1	peptidylprolyl isomerase
7573174	7605507	32333	Predicted by at least one method	WP_304992839.1		GIY62_RS33285	7588429	7603872	1	filamentous hemagglutinin N-terminal domain-containing protein
7573174	7605507	32333	Predicted by at least one method	WP_304992840.1		GIY62_RS33290	7603875	7604075	1	hypothetical protein
7573174	7605507	32333	Predicted by at least one method	WP_304992841.1		GIY62_RS33295	7604399	7605507	-1	IS3 family transposase
7936200	7943151	6951	Predicted by at least one method	WP_304993824.1		GIY62_RS34770	7936200	7936562	-1	hypothetical protein
7936200	7943151	6951	Predicted by at least one method	WP_055141361.1		GIY62_RS34775	7936618	7937274	-1	LPD29 domain-containing protein
7936200	7943151	6951	Predicted by at least one method	WP_304993825.1		GIY62_RS34780	7937354	7937839	-1	hypothetical protein
7936200	7943151	6951	Predicted by at least one method	WP_304993826.1		GIY62_RS34785	7938725	7939201	1	hypothetical protein
7936200	7943151	6951	Predicted by at least one method	WP_304993827.1		GIY62_RS34790	7939247	7939693	1	Fis family transcriptional regulator
7936200	7943151	6951	Predicted by at least one method	WP_304991524.1		GIY62_RS34795	7941691	7943151	1	ISNCY family transposase
7950307	7967887	17580	Predicted by at least one method	WP_304993833.1		GIY62_RS34835	7950307	7951353	-1	IS481 family transposase
7950307	7967887	17580	Predicted by at least one method			GIY62_RS34840	7951470	7952011	1	IS5 family transposase
7950307	7967887	17580	Predicted by at least one method	WP_304993834.1		GIY62_RS34845	7952050	7953288	-1	CaiB/BaiF CoA-transferase family protein
7950307	7967887	17580	Predicted by at least one method	WP_304993835.1		GIY62_RS34850	7953299	7954486	-1	acyl-CoA dehydrogenase
7950307	7967887	17580	Predicted by at least one method	WP_304993862.1		GIY62_RS34855	7954779	7955711	-1	FAD-binding protein
7950307	7967887	17580	Predicted by at least one method	WP_304993836.1		GIY62_RS34860	7955727	7956476	-1	electron transfer flavoprotein subunit beta/FixA family protein
7950307	7967887	17580	Predicted by at least one method	WP_304993837.1		GIY62_RS34865	7956550	7957710	-1	porin
7950307	7967887	17580	Predicted by at least one method	WP_304993838.1		GIY62_RS34870	7957914	7958786	-1	isocitrate lyase/PEP mutase family protein
7950307	7967887	17580	Predicted by at least one method	WP_304993863.1		GIY62_RS34875	7958792	7960147	-1	FAD-dependent oxidoreductase
7950307	7967887	17580	Predicted by at least one method	WP_304993839.1		GIY62_RS34880	7960200	7960718	-1	3-isopropylmalate dehydratase
7950307	7967887	17580	Predicted by at least one method	WP_304993840.1		GIY62_RS34885	7960715	7961980	-1	3-isopropylmalate dehydratase large subunit
7950307	7967887	17580	Predicted by at least one method	WP_304993864.1		GIY62_RS34890	7962064	7962843	-1	GntR family transcriptional regulator
7950307	7967887	17580	Predicted by at least one method	WP_304993841.1		GIY62_RS34895	7963201	7963434	-1	hypothetical protein
7950307	7967887	17580	Predicted by at least one method	WP_304993842.1		GIY62_RS34900	7963735	7964415	1	isochorismatase family protein
7950307	7967887	17580	Predicted by at least one method	WP_304993843.1		GIY62_RS34905	7964412	7965326	1	polysaccharide deacetylase family protein
7950307	7967887	17580	Predicted by at least one method	WP_304993844.1		GIY62_RS34910	7965323	7966252	1	polysaccharide deacetylase family protein
7950307	7967887	17580	Predicted by at least one method	WP_304993845.1		GIY62_RS34915	7966565	7967887	1	MFS transporter
7956550	7987629	31079	Predicted by at least one method	WP_304993837.1		GIY62_RS34865	7956550	7957710	-1	porin
7956550	7987629	31079	Predicted by at least one method	WP_304993838.1		GIY62_RS34870	7957914	7958786	-1	isocitrate lyase/PEP mutase family protein
7956550	7987629	31079	Predicted by at least one method	WP_304993863.1		GIY62_RS34875	7958792	7960147	-1	FAD-dependent oxidoreductase
7956550	7987629	31079	Predicted by at least one method	WP_304993839.1		GIY62_RS34880	7960200	7960718	-1	3-isopropylmalate dehydratase
7956550	7987629	31079	Predicted by at least one method	WP_304993840.1		GIY62_RS34885	7960715	7961980	-1	3-isopropylmalate dehydratase large subunit
7956550	7987629	31079	Predicted by at least one method	WP_304993864.1		GIY62_RS34890	7962064	7962843	-1	GntR family transcriptional regulator
7956550	7987629	31079	Predicted by at least one method	WP_304993841.1		GIY62_RS34895	7963201	7963434	-1	hypothetical protein
7956550	7987629	31079	Predicted by at least one method	WP_304993842.1		GIY62_RS34900	7963735	7964415	1	isochorismatase family protein
7956550	7987629	31079	Predicted by at least one method	WP_304993843.1		GIY62_RS34905	7964412	7965326	1	polysaccharide deacetylase family protein
7956550	7987629	31079	Predicted by at least one method	WP_304993844.1		GIY62_RS34910	7965323	7966252	1	polysaccharide deacetylase family protein
7956550	7987629	31079	Predicted by at least one method	WP_304993845.1		GIY62_RS34915	7966565	7967887	1	MFS transporter
7956550	7987629	31079	Predicted by at least one method			GIY62_RS34920	7967960	7968067	1	IS5/IS1182 family transposase
7956550	7987629	31079	Predicted by at least one method	WP_012735342.1		GIY62_RS34925	7968125	7968853	-1	IS6 family transposase
7956550	7987629	31079	Predicted by at least one method	WP_186149178.1		GIY62_RS34930	7968957	7969445	-1	RES family NAD+ phosphorylase
7956550	7987629	31079	Predicted by at least one method	WP_186107105.1		GIY62_RS34935	7969442	7969993	-1	DUF2384 domain-containing protein
7956550	7987629	31079	Predicted by at least one method	WP_304993846.1		GIY62_RS34940	7971158	7971559	-1	hypothetical protein
7956550	7987629	31079	Predicted by at least one method	WP_304993847.1		GIY62_RS34945	7971890	7973425	1	Mu transposase C-terminal domain-containing protein
7956550	7987629	31079	Predicted by at least one method	WP_304993848.1		GIY62_RS34950	7973434	7974306	1	TniB family NTP-binding protein
7956550	7987629	31079	Predicted by at least one method	WP_304993849.1		GIY62_RS34955	7974293	7974775	1	TniQ family protein
7956550	7987629	31079	Predicted by at least one method	WP_304993850.1		GIY62_RS34960	7974848	7975720	-1	P-loop NTPase fold protein
7956550	7987629	31079	Predicted by at least one method	WP_304993851.1		GIY62_RS34965	7975771	7976499	-1	hypothetical protein
7956550	7987629	31079	Predicted by at least one method	WP_304993852.1		GIY62_RS34970	7977203	7977892	-1	hypothetical protein
7956550	7987629	31079	Predicted by at least one method	WP_304993853.1		GIY62_RS34975	7977979	7979805	-1	site-specific integrase
7956550	7987629	31079	Predicted by at least one method	WP_304993854.1		GIY62_RS34980	7979802	7980182	-1	hypothetical protein
7956550	7987629	31079	Predicted by at least one method	WP_304993855.1		GIY62_RS34985	7980179	7980502	-1	hypothetical protein
7956550	7987629	31079	Predicted by at least one method	WP_304993856.1		GIY62_RS34990	7980553	7981641	-1	hypothetical protein
7956550	7987629	31079	Predicted by at least one method	WP_304993857.1		GIY62_RS34995	7981653	7982315	-1	hypothetical protein
7956550	7987629	31079	Predicted by at least one method	WP_304993858.1		GIY62_RS35000	7982350	7982607	-1	integrase
7956550	7987629	31079	Predicted by at least one method			GIY62_RS35005	7982946	7983255	1	transposase
7956550	7987629	31079	Predicted by at least one method	WP_055141390.1		GIY62_RS35010	7983554	7984321	1	glycoside hydrolase
7956550	7987629	31079	Predicted by at least one method			GIY62_RS35015	7984318	7984569	-1	methyl-accepting chemotaxis protein
7956550	7987629	31079	Predicted by at least one method	WP_082465567.1		GIY62_RS35020	7984693	7985598	-1	LysR family transcriptional regulator
7956550	7987629	31079	Predicted by at least one method	WP_055141391.1		GIY62_RS35025	7985763	7986605	1	NAD(P)H-dependent oxidoreductase
7956550	7987629	31079	Predicted by at least one method	WP_055141392.1		GIY62_RS35030	7986622	7987629	1	NAD(P)-dependent alcohol dehydrogenase
7968125	7977892	9767	Predicted by at least one method	WP_012735342.1		GIY62_RS34925	7968125	7968853	-1	IS6 family transposase
7968125	7977892	9767	Predicted by at least one method	WP_186149178.1		GIY62_RS34930	7968957	7969445	-1	RES family NAD+ phosphorylase
7968125	7977892	9767	Predicted by at least one method	WP_186107105.1		GIY62_RS34935	7969442	7969993	-1	DUF2384 domain-containing protein
7968125	7977892	9767	Predicted by at least one method	WP_304993846.1		GIY62_RS34940	7971158	7971559	-1	hypothetical protein
7968125	7977892	9767	Predicted by at least one method	WP_304993847.1		GIY62_RS34945	7971890	7973425	1	Mu transposase C-terminal domain-containing protein
7968125	7977892	9767	Predicted by at least one method	WP_304993848.1		GIY62_RS34950	7973434	7974306	1	TniB family NTP-binding protein
7968125	7977892	9767	Predicted by at least one method	WP_304993849.1		GIY62_RS34955	7974293	7974775	1	TniQ family protein
7968125	7977892	9767	Predicted by at least one method	WP_304993850.1		GIY62_RS34960	7974848	7975720	-1	P-loop NTPase fold protein
7968125	7977892	9767	Predicted by at least one method	WP_304993851.1		GIY62_RS34965	7975771	7976499	-1	hypothetical protein
7968125	7977892	9767	Predicted by at least one method	WP_304993852.1		GIY62_RS34970	7977203	7977892	-1	hypothetical protein
7982350	7988842	6492	Predicted by at least one method	WP_304993858.1		GIY62_RS35000	7982350	7982607	-1	integrase
7982350	7988842	6492	Predicted by at least one method			GIY62_RS35005	7982946	7983255	1	transposase
7982350	7988842	6492	Predicted by at least one method	WP_055141390.1		GIY62_RS35010	7983554	7984321	1	glycoside hydrolase
7982350	7988842	6492	Predicted by at least one method			GIY62_RS35015	7984318	7984569	-1	methyl-accepting chemotaxis protein
7982350	7988842	6492	Predicted by at least one method	WP_082465567.1		GIY62_RS35020	7984693	7985598	-1	LysR family transcriptional regulator
7982350	7988842	6492	Predicted by at least one method	WP_055141391.1		GIY62_RS35025	7985763	7986605	1	NAD(P)H-dependent oxidoreductase
7982350	7988842	6492	Predicted by at least one method	WP_055141392.1		GIY62_RS35030	7986622	7987629	1	NAD(P)-dependent alcohol dehydrogenase
7982350	7988842	6492	Predicted by at least one method			GIY62_RS35035	7987799	7988053	1	transposase
7982350	7988842	6492	Predicted by at least one method			GIY62_RS35040	7988114	7988842	-1	IS6 family transposase
7990906	7997730	6824	Predicted by at least one method	WP_055141395.1		GIY62_RS35050	7990906	7991544	-1	response regulator transcription factor
7990906	7997730	6824	Predicted by at least one method	WP_055141440.1		GIY62_RS35055	7992027	7993172	1	EAL domain-containing protein
7990906	7997730	6824	Predicted by at least one method	WP_304993859.1		GIY62_RS35060	7993299	7994417	1	histidine kinase
7990906	7997730	6824	Predicted by at least one method	WP_055141441.1	istA	GIY62_RS35065	7994632	7996134	1	IS21 family transposase
7990906	7997730	6824	Predicted by at least one method	WP_055141397.1	istB	GIY62_RS35070	7996127	7996924	1	IS21-like element helper ATPase IstB
7990906	7997730	6824	Predicted by at least one method			GIY62_RS35075	7996996	7997730	-1	ISKra4 family transposase
8012798	8027415	14617	Predicted by at least one method	WP_244132145.1		GIY62_RS35150	8012798	8013079	1	GNAT family N-acetyltransferase
8012798	8027415	14617	Predicted by at least one method			GIY62_RS35155	8013331	8014501	-1	IS30 family transposase
8012798	8027415	14617	Predicted by at least one method	WP_055141406.1		GIY62_RS35160	8014763	8015965	-1	porin
8012798	8027415	14617	Predicted by at least one method	WP_304993860.1		GIY62_RS35165	8016162	8017496	-1	MFS transporter
8012798	8027415	14617	Predicted by at least one method	WP_082465570.1		GIY62_RS35170	8017577	8019034	-1	aldehyde dehydrogenase family protein
8012798	8027415	14617	Predicted by at least one method	WP_063891387.1		GIY62_RS35175	8019063	8020124	-1	alcohol dehydrogenase
8012798	8027415	14617	Predicted by at least one method	WP_304993861.1		GIY62_RS35180	8020133	8021185	-1	aromatic ring-hydroxylating dioxygenase subunit alpha
8012798	8027415	14617	Predicted by at least one method	WP_082465571.1		GIY62_RS35185	8021326	8022138	-1	LuxR C-terminal-related transcriptional regulator
8012798	8027415	14617	Predicted by at least one method			GIY62_RS35190	8022362	8023606	1	porin
8012798	8027415	14617	Predicted by at least one method	WP_055141410.1		GIY62_RS35195	8023630	8024412	-1	FadR/GntR family transcriptional regulator
8012798	8027415	14617	Predicted by at least one method	WP_082465572.1		GIY62_RS35200	8024484	8024927	-1	OB-fold domain-containing protein
8012798	8027415	14617	Predicted by at least one method	WP_285645939.1		GIY62_RS35205	8024924	8026108	-1	acetyl-CoA acetyltransferase
8012798	8027415	14617	Predicted by at least one method	WP_055141412.1		GIY62_RS35210	8026105	8027415	-1	CoA transferase
8028465	8059305	30840	Predicted by at least one method	WP_055141414.1		GIY62_RS35220	8028465	8029787	-1	Rieske 2Fe-2S domain-containing protein
8028465	8059305	30840	Predicted by at least one method	WP_055141415.1		GIY62_RS35225	8030241	8030780	1	MFS transporter
8028465	8059305	30840	Predicted by at least one method	WP_148654294.1		GIY62_RS35230	8030971	8032053	1	CaiB/BaiF CoA-transferase family protein
8028465	8059305	30840	Predicted by at least one method			GIY62_RS35235	8032227	8032388	1	IS6 family transposase
8028465	8059305	30840	Predicted by at least one method			GIY62_RS35240	8032568	8033610	-1	DUF2891 domain-containing protein
8028465	8059305	30840	Predicted by at least one method	WP_055139847.1		GIY62_RS35245	8033630	8034094	-1	hypothetical protein
8028465	8059305	30840	Predicted by at least one method			GIY62_RS35250	8034097	8034495	-1	metallopeptidase TldD-related protein
8028465	8059305	30840	Predicted by at least one method	WP_055141419.1		GIY62_RS35255	8034553	8035275	-1	IS6 family transposase
8028465	8059305	30840	Predicted by at least one method	WP_158512108.1		GIY62_RS35260	8035301	8035444	-1	hypothetical protein
8028465	8059305	30840	Predicted by at least one method	WP_304993753.1		GIY62_RS35265	8035964	8036176	1	hypothetical protein
8028465	8059305	30840	Predicted by at least one method	WP_304993754.1		GIY62_RS35270	8036158	8036793	-1	hypothetical protein
8028465	8059305	30840	Predicted by at least one method	WP_304993755.1		GIY62_RS35275	8037142	8041500	-1	hypothetical protein
8028465	8059305	30840	Predicted by at least one method	WP_304993756.1		GIY62_RS35280	8041539	8043374	-1	site-specific integrase
8028465	8059305	30840	Predicted by at least one method	WP_304993757.1		GIY62_RS35285	8043387	8044355	-1	abortive infection family protein
8028465	8059305	30840	Predicted by at least one method	WP_304993758.1		GIY62_RS35290	8044450	8044992	-1	hypothetical protein
8028465	8059305	30840	Predicted by at least one method	WP_244486993.1		GIY62_RS35295	8045252	8045767	-1	RES domain-containing protein
8028465	8059305	30840	Predicted by at least one method	WP_055141425.1		GIY62_RS35300	8045972	8046649	-1	hypothetical protein
8028465	8059305	30840	Predicted by at least one method	WP_304993759.1		GIY62_RS35305	8046662	8047453	-1	hypothetical protein
8028465	8059305	30840	Predicted by at least one method	WP_055141427.1		GIY62_RS35310	8047607	8047792	-1	hypothetical protein
8028465	8059305	30840	Predicted by at least one method	WP_304993760.1		GIY62_RS35315	8048186	8048473	-1	hypothetical protein
8028465	8059305	30840	Predicted by at least one method	WP_304993761.1		GIY62_RS35320	8049499	8051202	-1	patatin-like phospholipase family protein
8028465	8059305	30840	Predicted by at least one method	WP_304993762.1		GIY62_RS35325	8051639	8052283	1	AAA family ATPase
8028465	8059305	30840	Predicted by at least one method	WP_304993763.1		GIY62_RS35330	8052286	8053323	1	ParB/RepB/Spo0J family partition protein
8028465	8059305	30840	Predicted by at least one method	WP_304993764.1		GIY62_RS35335	8053407	8054711	-1	replication initiation protein
8028465	8059305	30840	Predicted by at least one method	WP_304993765.1		GIY62_RS35340	8056233	8057135	-1	Crp/Fnr family transcriptional regulator
8028465	8059305	30840	Predicted by at least one method	WP_304993766.1		GIY62_RS35345	8057550	8058887	-1	DUF1173 domain-containing protein
8028465	8059305	30840	Predicted by at least one method	WP_304993767.1		GIY62_RS35350	8058901	8059305	-1	hypothetical protein
8030241	8041500	11259	Predicted by at least one method	WP_055141415.1		GIY62_RS35225	8030241	8030780	1	MFS transporter
8030241	8041500	11259	Predicted by at least one method	WP_148654294.1		GIY62_RS35230	8030971	8032053	1	CaiB/BaiF CoA-transferase family protein
8030241	8041500	11259	Predicted by at least one method			GIY62_RS35235	8032227	8032388	1	IS6 family transposase
8030241	8041500	11259	Predicted by at least one method			GIY62_RS35240	8032568	8033610	-1	DUF2891 domain-containing protein
8030241	8041500	11259	Predicted by at least one method	WP_055139847.1		GIY62_RS35245	8033630	8034094	-1	hypothetical protein
8030241	8041500	11259	Predicted by at least one method			GIY62_RS35250	8034097	8034495	-1	metallopeptidase TldD-related protein
8030241	8041500	11259	Predicted by at least one method	WP_055141419.1		GIY62_RS35255	8034553	8035275	-1	IS6 family transposase
8030241	8041500	11259	Predicted by at least one method	WP_158512108.1		GIY62_RS35260	8035301	8035444	-1	hypothetical protein
8030241	8041500	11259	Predicted by at least one method	WP_304993753.1		GIY62_RS35265	8035964	8036176	1	hypothetical protein
8030241	8041500	11259	Predicted by at least one method	WP_304993754.1		GIY62_RS35270	8036158	8036793	-1	hypothetical protein
8030241	8041500	11259	Predicted by at least one method	WP_304993755.1		GIY62_RS35275	8037142	8041500	-1	hypothetical protein
8043387	8047792	4405	Predicted by at least one method	WP_304993757.1		GIY62_RS35285	8043387	8044355	-1	abortive infection family protein
8043387	8047792	4405	Predicted by at least one method	WP_304993758.1		GIY62_RS35290	8044450	8044992	-1	hypothetical protein
8043387	8047792	4405	Predicted by at least one method	WP_244486993.1		GIY62_RS35295	8045252	8045767	-1	RES domain-containing protein
8043387	8047792	4405	Predicted by at least one method	WP_055141425.1		GIY62_RS35300	8045972	8046649	-1	hypothetical protein
8043387	8047792	4405	Predicted by at least one method	WP_304993759.1		GIY62_RS35305	8046662	8047453	-1	hypothetical protein
8043387	8047792	4405	Predicted by at least one method	WP_055141427.1		GIY62_RS35310	8047607	8047792	-1	hypothetical protein
8049499	8054711	5212	Predicted by at least one method	WP_304993761.1		GIY62_RS35320	8049499	8051202	-1	patatin-like phospholipase family protein
8049499	8054711	5212	Predicted by at least one method	WP_304993762.1		GIY62_RS35325	8051639	8052283	1	AAA family ATPase
8049499	8054711	5212	Predicted by at least one method	WP_304993763.1		GIY62_RS35330	8052286	8053323	1	ParB/RepB/Spo0J family partition protein
8049499	8054711	5212	Predicted by at least one method	WP_304993764.1		GIY62_RS35335	8053407	8054711	-1	replication initiation protein
8068727	8073922	5195	Predicted by at least one method	WP_304993777.1		GIY62_RS35400	8068727	8069017	-1	hypothetical protein
8068727	8073922	5195	Predicted by at least one method	WP_304993778.1		GIY62_RS35405	8069014	8069643	-1	phospholipase D family protein
8068727	8073922	5195	Predicted by at least one method	WP_304993779.1		GIY62_RS35410	8069907	8070293	1	hypothetical protein
8068727	8073922	5195	Predicted by at least one method	WP_304993780.1		GIY62_RS35415	8070338	8073922	-1	conjugal transfer protein TraG N-terminal domain-containing protein
8096556	8103367	6811	Predicted by at least one method	WP_304993867.1		GIY62_RS35540	8096556	8097011	-1	lytic transglycosylase domain-containing protein
8096556	8103367	6811	Predicted by at least one method	WP_055141434.1		GIY62_RS35545	8098167	8099060	-1	LysR family transcriptional regulator
8096556	8103367	6811	Predicted by at least one method	WP_304993799.1		GIY62_RS35550	8099224	8099574	1	DUF485 domain-containing protein
8096556	8103367	6811	Predicted by at least one method	WP_304993800.1		GIY62_RS35555	8099564	8101417	1	cation acetate symporter
8096556	8103367	6811	Predicted by at least one method	WP_304993801.1		GIY62_RS35560	8101443	8102477	1	carbon-nitrogen hydrolase family protein
8096556	8103367	6811	Predicted by at least one method	WP_082465559.1		GIY62_RS35565	8102660	8103367	1	LuxR family transcriptional regulator
8113352	8120205	6853	Predicted by at least one method	WP_304993808.1		GIY62_RS35600	8113352	8115412	-1	type IV secretion system DNA-binding domain-containing protein
8113352	8120205	6853	Predicted by at least one method	WP_304993809.1		GIY62_RS35605	8115405	8115854	-1	hypothetical protein
8113352	8120205	6853	Predicted by at least one method	WP_304993810.1		GIY62_RS35610	8117993	8118601	-1	hypothetical protein
8113352	8120205	6853	Predicted by at least one method	WP_304993811.1		GIY62_RS35615	8119201	8119497	1	hypothetical protein
8113352	8120205	6853	Predicted by at least one method	WP_304993812.1		GIY62_RS35620	8119652	8119867	-1	DUF3717 domain-containing protein
8113352	8120205	6853	Predicted by at least one method	WP_304993813.1		GIY62_RS35630	8120032	8120205	-1	hypothetical protein
